# Supplementary material for: Influence of ligand substitution and the solvent effect on the structures and magnetic properties of dinuclear Dy2 supramolecular architectures constructed with the bis-β-diketonate-Dy2 building block as a metalloligand
Source: Royal Society of Chemistry journal article supplement (doi:10.1039/d2dt03468a), 2023-01-01
Supplement: d2dt03468a1.pdf [file d2dt03468a1.pdf]

**Influence of ligand substitution and solvent effect on structures and magnetic properties of dinuclear Dy<sub>2</sub> supramolecular architectures constructed with bis-β-diketonate-Dy<sub>2</sub> building block as metalloligand**

Jiamin Tang,<sup>a</sup> Sheng Zhang,<sup>\*a</sup> Linzhou Li,<sup>a</sup> Linbin Yao,<sup>a</sup> Ronghu Zhang,<sup>\*b,c</sup> Bing Yin,<sup>\*d</sup> Jiangwei Zhang<sup>\*e</sup>

**AUTHOR ADDRESS**

---

*<sup>a</sup> School of Science, Hainan University, Haikou 570228, China*

*<sup>b</sup> Key Laboratory of Tropical Biological Resources of Ministry of Education, Hainan University, Haikou 570228, China*

*<sup>c</sup> Institute of Processing&Design of Agroproducts, Hainan Academy of Agricultural Science, Haikou 571100, China*

*<sup>d</sup> Lab of Theoretical Molecular Magnetism (LTMM), College of Chemistry and Materials Science, Northwest University, Xi'an, 710127 P. R. China*

*<sup>e</sup> Zhang Dayu College of Chemistry, State Key Laboratory of Fine Chemicals, Dalian University of Technology, Dalian 116024, P. R. China Dalian National Laboratory for Clean Energy & State Key Laboratory of Catalysis, Dalian Institute of Chemical Physics, Chinese Academy of Sciences, Dalian, 116023, P. R. China*

---

**Corresponding authors**

**\*E-mail: zhangsheng19890501@163.com (S. Zhang)**

**\*E-mail: zrh0912@126.com (R. H. Zhang)**

**\*E-mail: rayinyin@nwu.edu.cn (B. Yin)**

**\*E-mail: zjw11@tsinghua.org.cn (J. W. Zhang)**

**Table S1** Bond lengths and bond angles for **1-6**.

| Compound 1 |      |      |          |
|------------|------|------|----------|
| Atom       |      | Atom | Length/Å |
| Dy1        |      | O3   | 2.330(7) |
| Dy1        |      | O4   | 2.342(8) |
| Dy1        |      | O7   | 2.321(7) |
| Dy1        |      | O8   | 2.346(8) |
| Dy1        |      | O11  | 2.315(8) |
| Dy1        |      | O12  | 2.398(7) |
| Dy1        |      | O15  | 2.337(7) |
| Dy1        |      | O16  | 2.363(8) |
| Dy2        |      | O1   | 2.361(8) |
| Dy2        |      | O2   | 2.329(7) |
| Dy2        |      | O5   | 2.338(8) |
| Dy2        |      | O6   | 2.328(7) |
| Dy2        |      | O9   | 2.352(8) |
| Dy2        |      | O10  | 2.317(8) |
| Dy2        |      | O13  | 2.394(7) |
| Dy2        |      | O14  | 2.354(7) |
| Atom       | Atom | Atom | Angle/°  |
| O3         | Dy1  | O4   | 74.3(3)  |
| O3         | Dy1  | O8   | 80.3(3)  |
| O3         | Dy1  | O12  | 147.5(3) |
| O3         | Dy1  | O15  | 71.3(2)  |
| O3         | Dy1  | O16  | 137.2(2) |
| O4         | Dy1  | O8   | 73.3(3)  |
| O4         | Dy1  | O12  | 117.2(3) |
| O4         | Dy1  | O16  | 77.5(3)  |
| O7         | Dy1  | O3   | 73.7(3)  |
| O7         | Dy1  | O4   | 137.2(3) |
| O7         | Dy1  | O8   | 74.0(3)  |
| O7         | Dy1  | O12  | 79.3(3)  |
| O7         | Dy1  | O15  | 114.2(3) |
| O7         | Dy1  | O16  | 144.2(3) |
| O8         | Dy1  | O12  | 75.1(3)  |
| O8         | Dy1  | O16  | 121.0(3) |
| O11        | Dy1  | O3   | 112.6(3) |
| O11        | Dy1  | O4   | 148.1(3) |
| O11        | Dy1  | O7   | 71.9(3)  |

|            |     |     |          |
|------------|-----|-----|----------|
| O11        | Dy1 | O8  | 137.6(3) |
| O11        | Dy1 | O12 | 74.6(3)  |
| O11        | Dy1 | O15 | 73.0(3)  |
| O11        | Dy1 | O16 | 77.8(3)  |
| O15        | Dy1 | O4  | 80.8(3)  |
| O15        | Dy1 | O8  | 145.7(3) |
| O15        | Dy1 | O12 | 138.0(3) |
| O15        | Dy1 | O16 | 73.0(3)  |
| O16        | Dy1 | O12 | 74.7(3)  |
| O1         | Dy2 | O13 | 74.2(3)  |
| O2         | Dy2 | O1  | 73.5(3)  |
| O2         | Dy2 | O5  | 137.5(3) |
| O2         | Dy2 | O9  | 147.0(3) |
| O2         | Dy2 | O13 | 81.3(3)  |
| O2         | Dy2 | O14 | 72.1(3)  |
| O5         | Dy2 | O1  | 75.9(3)  |
| O5         | Dy2 | O9  | 74.8(3)  |
| O5         | Dy2 | O13 | 117.5(3) |
| O5         | Dy2 | O14 | 146.9(3) |
| O6         | Dy2 | O1  | 80.1(3)  |
| O6         | Dy2 | O2  | 72.6(3)  |
| O6         | Dy2 | O5  | 73.7(3)  |
| O6         | Dy2 | O9  | 136.4(3) |
| O6         | Dy2 | O13 | 147.5(3) |
| O6         | Dy2 | O14 | 113.9(3) |
| O9         | Dy2 | O1  | 119.8(3) |
| O9         | Dy2 | O13 | 74.8(3)  |
| O9         | Dy2 | O14 | 79.6(3)  |
| O10        | Dy2 | O1  | 148.4(3) |
| O10        | Dy2 | O2  | 111.1(3) |
| O10        | Dy2 | O5  | 81.7(3)  |
| O10        | Dy2 | O6  | 72.3(3)  |
| O10        | Dy2 | O9  | 74.1(3)  |
| O10        | Dy2 | O13 | 136.9(3) |
| O10        | Dy2 | O14 | 71.2(3)  |
| O14        | Dy2 | O1  | 136.1(3) |
| O14        | Dy2 | O13 | 74.4(3)  |
| Compound 2 |     |     |          |

| <b>Atom</b>           | <b>Atom</b>     | <b>Length/Å</b> |                |
|-----------------------|-----------------|-----------------|----------------|
| Dy1                   | N1              | 2.533(8)        |                |
| Dy1                   | N2              | 2.551(10)       |                |
| Dy1                   | O1              | 2.321(9)        |                |
| Dy1                   | O2              | 2.366(7)        |                |
| Dy1                   | O3 <sup>1</sup> | 2.311(7)        |                |
| Dy1                   | O4 <sup>1</sup> | 2.327(8)        |                |
| Dy1                   | O5              | 2.315(9)        |                |
| Dy1                   | O6              | 2.362(7)        |                |
| <sup>1</sup> -X,-Y,+Z |                 |                 |                |
| <b>Atom</b>           | <b>Atom</b>     | <b>Atom</b>     | <b>Angle/°</b> |
| N1                    | Dy1             | N2              | 64.9(4)        |
| O1                    | Dy1             | N1              | 69.9(5)        |
| O1                    | Dy1             | N2              | 105.0(3)       |
| O1                    | Dy1             | O2              | 73.7(3)        |
| O1                    | Dy1             | O4 <sup>1</sup> | 75.6(3)        |
| O1                    | Dy1             | O6              | 154.1(3)       |
| O2                    | Dy1             | N1              | 113.8(3)       |
| O2                    | Dy1             | N2              | 74.2(3)        |
| O3 <sup>1</sup>       | Dy1             | N1              | 146.7(4)       |
| O3 <sup>1</sup>       | Dy1             | N2              | 144.3(3)       |
| O3 <sup>1</sup>       | Dy1             | O1              | 83.3(3)        |
| O3 <sup>1</sup>       | Dy1             | O2              | 75.2(2)        |
| O3 <sup>1</sup>       | Dy1             | O4 <sup>1</sup> | 73.4(3)        |
| O3 <sup>1</sup>       | Dy1             | O5              | 121.7(3)       |
| O3 <sup>1</sup>       | Dy1             | O6              | 79.5(3)        |
| O4 <sup>1</sup>       | Dy1             | N1              | 80.7(3)        |
| O4 <sup>1</sup>       | Dy1             | N2              | 142.2(3)       |
| O4 <sup>1</sup>       | Dy1             | O2              | 138.0(3)       |
| O4 <sup>1</sup>       | Dy1             | O6              | 117.1(3)       |
| O5                    | Dy1             | N1              | 69.8(5)        |
| O5                    | Dy1             | N2              | 77.7(3)        |
| O5                    | Dy1             | O1              | 133.4(3)       |
| O5                    | Dy1             | O2              | 145.7(3)       |
| O5                    | Dy1             | O4 <sup>1</sup> | 75.8(3)        |
| O5                    | Dy1             | O6              | 72.4(3)        |
| O6                    | Dy1             | N1              | 132.1(5)       |
| O6                    | Dy1             | N2              | 79.2(3)        |
| O6                    | Dy1             | O2              | 83.2(2)        |

| <sup>1</sup> -X,-Y,+Z |      |      |            |
|-----------------------|------|------|------------|
| Compound 3            |      |      |            |
| Atom                  |      | Atom | Length/Å   |
| Dy1                   |      | N1   | 2.534(6)   |
| Dy1                   |      | N2   | 2.567(7)   |
| Dy1                   |      | O1   | 2.308(6)   |
| Dy1                   |      | O2   | 2.315(6)   |
| Dy1                   |      | O5   | 2.336(6)   |
| Dy1                   |      | O6   | 2.310(5)   |
| Dy1                   |      | O9   | 2.335(6)   |
| Dy1                   |      | O10  | 2.350(6)   |
| Dy2                   |      | N3   | 2.543(8)   |
| Dy2                   |      | N4   | 2.537(7)   |
| Dy2                   |      | O3   | 2.361(6)   |
| Dy2                   |      | O4   | 2.328(7)   |
| Dy2                   |      | O7   | 2.303(6)   |
| Dy2                   |      | O8   | 2.298(7)   |
| Dy2                   |      | O11  | 2.327(5)   |
| Dy2                   |      | O12  | 2.311(6)   |
| Atom                  | Atom | Atom | Angle/°    |
| N1                    | Dy1  | N2   | 63.9(2)    |
| O1                    | Dy1  | N1   | 79.5(2)    |
| O1                    | Dy1  | N2   | 136.9(2)   |
| O1                    | Dy1  | O2   | 73.9(2)    |
| O1                    | Dy1  | O5   | 77.7(2)    |
| O1                    | Dy1  | O6   | 142.5(2)   |
| O1                    | Dy1  | O9   | 75.3(2)    |
| O1                    | Dy1  | O10  | 119.5(2)   |
| O2                    | Dy1  | N1   | 146.3(2)   |
| O2                    | Dy1  | N2   | 148.0(2)   |
| O2                    | Dy1  | O5   | 84.2(2)    |
| O2                    | Dy1  | O9   | 116.5(2)   |
| O2                    | Dy1  | O10  | 76.37(19)  |
| O5                    | Dy1  | N1   | 70.0(2)    |
| O5                    | Dy1  | N2   | 107.9(2)   |
| O5                    | Dy1  | O10  | 148.04(19) |
| O6                    | Dy1  | N1   | 109.6(2)   |
| O6                    | Dy1  | N2   | 74.9(2)    |

|     |     |     |           |
|-----|-----|-----|-----------|
| O6  | Dy1 | O2  | 81.26(19) |
| O6  | Dy1 | O5  | 72.1(2)   |
| O6  | Dy1 | O9  | 141.9(2)  |
| O6  | Dy1 | O10 | 79.93(19) |
| O9  | Dy1 | N1  | 75.0(2)   |
| O9  | Dy1 | N2  | 73.9(2)   |
| O9  | Dy1 | O5  | 139.0(2)  |
| O9  | Dy1 | O10 | 72.9(2)   |
| O10 | Dy1 | N1  | 136.0(2)  |
| O10 | Dy1 | N2  | 78.7(2)   |
| N4  | Dy2 | N3  | 63.0(3)   |
| O3  | Dy2 | N3  | 128.0(2)  |
| O3  | Dy2 | N4  | 77.0(2)   |
| O4  | Dy2 | N3  | 70.8(3)   |
| O4  | Dy2 | N4  | 82.2(2)   |
| O4  | Dy2 | O3  | 72.1(2)   |
| O7  | Dy2 | N3  | 113.2(3)  |
| O7  | Dy2 | N4  | 72.7(2)   |
| O7  | Dy2 | O3  | 82.30(19) |
| O7  | Dy2 | O4  | 147.5(2)  |
| O7  | Dy2 | O11 | 77.2(2)   |
| O7  | Dy2 | O12 | 137.1(2)  |
| O8  | Dy2 | N3  | 73.0(3)   |
| O8  | Dy2 | N4  | 104.2(2)  |
| O8  | Dy2 | O3  | 152.9(2)  |
| O8  | Dy2 | O4  | 135.0(2)  |
| O8  | Dy2 | O7  | 72.6(2)   |
| O8  | Dy2 | O11 | 87.1(2)   |
| O8  | Dy2 | O12 | 75.0(2)   |
| O11 | Dy2 | N3  | 152.5(2)  |
| O11 | Dy2 | N4  | 142.6(2)  |
| O11 | Dy2 | O3  | 77.42(19) |
| O11 | Dy2 | O4  | 114.8(2)  |
| O12 | Dy2 | N3  | 82.7(3)   |
| O12 | Dy2 | N4  | 143.5(2)  |
| O12 | Dy2 | O3  | 120.3(2)  |
| O12 | Dy2 | O4  | 74.6(2)   |
| O12 | Dy2 | O11 | 73.7(2)   |

| Compound 4               |                 |                 |            |
|--------------------------|-----------------|-----------------|------------|
| Atom                     | Atom            | Length/Å        |            |
| Dy1                      | N1              | 2.583(4)        |            |
| Dy1                      | N2              | 2.582(4)        |            |
| Dy1                      | O1              | 2.348(4)        |            |
| Dy1                      | O2              | 2.333(3)        |            |
| Dy1                      | O3 <sup>1</sup> | 2.308(3)        |            |
| Dy1                      | O4 <sup>1</sup> | 2.316(4)        |            |
| Dy1                      | O5              | 2.344(3)        |            |
| Dy1                      | O6              | 2.285(3)        |            |
| <sup>1</sup> -X,+Y,1/2+Z |                 |                 |            |
| Atom                     | Atom            | Atom            | Angle/°    |
| N2                       | Dy1             | N1              | 63.03(12)  |
| O1                       | Dy1             | N1              | 70.77(14)  |
| O1                       | Dy1             | N2              | 94.40(14)  |
| O2                       | Dy1             | N1              | 117.26(13) |
| O2                       | Dy1             | N2              | 72.37(11)  |
| O2                       | Dy1             | O1              | 71.22(12)  |
| O2                       | Dy1             | O5              | 77.15(11)  |
| O3 <sup>1</sup>          | Dy1             | N1              | 127.24(13) |
| O3 <sup>1</sup>          | Dy1             | N2              | 77.38(13)  |
| O3 <sup>1</sup>          | Dy1             | O1              | 149.36(11) |
| O3 <sup>1</sup>          | Dy1             | O2              | 78.18(11)  |
| O3 <sup>1</sup>          | Dy1             | O4 <sup>1</sup> | 71.78(12)  |
| O3 <sup>1</sup>          | Dy1             | O5              | 76.72(11)  |
| O4 <sup>1</sup>          | Dy1             | N1              | 69.21(14)  |
| O4 <sup>1</sup>          | Dy1             | N2              | 81.47(13)  |
| O4 <sup>1</sup>          | Dy1             | O1              | 136.86(12) |
| O4 <sup>1</sup>          | Dy1             | O2              | 143.71(13) |
| O4 <sup>1</sup>          | Dy1             | O5              | 114.05(13) |
| O5                       | Dy1             | N1              | 152.65(12) |
| O5                       | Dy1             | N2              | 143.26(11) |
| O5                       | Dy1             | O1              | 94.76(13)  |
| O6                       | Dy1             | N1              | 80.29(12)  |

|    |     |                 |            |
|----|-----|-----------------|------------|
| O6 | Dy1 | N2              | 143.23(12) |
| O6 | Dy1 | O1              | 74.75(14)  |
| O6 | Dy1 | O2              | 132.30(13) |
| O6 | Dy1 | O3 <sup>1</sup> | 128.31(13) |
| O6 | Dy1 | O4 <sup>1</sup> | 83.26(14)  |
| O6 | Dy1 | O5              | 73.41(11)  |

<sup>1</sup>-X,+Y,1/2+Z

**Compound 4a**

| <b>Atom</b> |             | <b>Atom</b> |                | <b>Length/Å</b> |
|-------------|-------------|-------------|----------------|-----------------|
| Dy1         |             | N1          |                | 2.565(7)        |
| Dy1         |             | N2          |                | 2.572(7)        |
| Dy1         |             | O1          |                | 2.283(5)        |
| Dy1         |             | O2          |                | 2.331(4)        |
| Dy1         |             | O5          |                | 2.325(7)        |
| Dy1         |             | O6          |                | 2.304(6)        |
| Dy1         |             | O9          |                | 2.328(5)        |
| Dy1         |             | O10         |                | 2.343(5)        |
| Dy2         |             | N5          |                | 2.556(7)        |
| Dy2         |             | N6          |                | 2.502(7)        |
| Dy2         |             | O3          |                | 2.336(6)        |
| Dy2         |             | O4          |                | 2.266(6)        |
| Dy2         |             | O7          |                | 2.294(6)        |
| Dy2         |             | O8          |                | 2.347(9)        |
| Dy2         |             | O11         |                | 2.277(7)        |
| Dy2         |             | O12         |                | 2.388(8)        |
| <b>Atom</b> | <b>Atom</b> | <b>Atom</b> | <b>Angle/°</b> |                 |
| N1          | Dy1         | N2          | 62.8(2)        |                 |
| O1          | Dy1         | N1          | 83.1(2)        |                 |
| O1          | Dy1         | N2          | 145.33(19)     |                 |
| O1          | Dy1         | O2          | 73.75(18)      |                 |
| O1          | Dy1         | O5          | 73.8(2)        |                 |
| O1          | Dy1         | O6          | 133.11(19)     |                 |
| O1          | Dy1         | O9          | 81.57(19)      |                 |
| O1          | Dy1         | O10         | 122.23(19)     |                 |
| O2          | Dy1         | N1          | 153.3(2)       |                 |
| O2          | Dy1         | N2          | 140.8(2)       |                 |
| O2          | Dy1         | O10         | 78.86(18)      |                 |
| O5          | Dy1         | N1          | 71.0(2)        |                 |
| O5          | Dy1         | N2          | 99.0(2)        |                 |



|     |     |     |            |
|-----|-----|-----|------------|
| O5  | Dy1 | O2  | 89.6(2)    |
| O5  | Dy1 | O9  | 132.4(2)   |
| O5  | Dy1 | O10 | 155.4(2)   |
| O6  | Dy1 | N1  | 113.9(2)   |
| O6  | Dy1 | N2  | 71.6(2)    |
| O6  | Dy1 | O2  | 75.07(19)  |
| O6  | Dy1 | O5  | 71.84(18)  |
| O6  | Dy1 | O9  | 145.21(19) |
| O6  | Dy1 | O10 | 84.2(2)    |
| O9  | Dy1 | N1  | 66.0(2)    |
| O9  | Dy1 | N2  | 79.1(2)    |
| O9  | Dy1 | O2  | 121.80(18) |
| O9  | Dy1 | O10 | 71.4(2)    |
| O10 | Dy1 | N1  | 125.9(2)   |
| O10 | Dy1 | N2  | 77.8(2)    |
| N6  | Dy2 | N5  | 64.2(2)    |
| O3  | Dy2 | N5  | 138.6(2)   |
| O3  | Dy2 | N6  | 151.0(2)   |
| O3  | Dy2 | O8  | 122.8(3)   |
| O3  | Dy2 | O12 | 81.7(2)    |
| O4  | Dy2 | N5  | 146.8(2)   |
| O4  | Dy2 | N6  | 88.2(2)    |
| O4  | Dy2 | O3  | 74.0(2)    |
| O4  | Dy2 | O7  | 111.3(3)   |
| O4  | Dy2 | O8  | 75.1(3)    |
| O4  | Dy2 | O11 | 139.9(3)   |
| O4  | Dy2 | O12 | 76.4(3)    |
| O7  | Dy2 | N5  | 79.2(2)    |
| O7  | Dy2 | N6  | 132.8(2)   |
| O7  | Dy2 | O3  | 75.9(2)    |
| O7  | Dy2 | O8  | 72.4(2)    |
| O7  | Dy2 | O12 | 152.7(2)   |
| O8  | Dy2 | N5  | 78.8(3)    |
| O8  | Dy2 | N6  | 72.1(3)    |
| O8  | Dy2 | O12 | 134.1(3)   |
| O11 | Dy2 | N5  | 68.9(3)    |
| O11 | Dy2 | N6  | 104.1(3)   |
| O11 | Dy2 | O3  | 77.8(2)    |
| O11 | Dy2 | O7  | 88.2(2)    |

|                          |                 |                 |                |
|--------------------------|-----------------|-----------------|----------------|
| O11                      | Dy2             | O8              | 144.9(3)       |
| O11                      | Dy2             | O12             | 71.8(3)        |
| O12                      | Dy2             | N5              | 109.2(3)       |
| O12                      | Dy2             | N6              | 71.8(3)        |
| <b>Compound 5</b>        |                 |                 |                |
| <b>Atom</b>              | <b>Atom</b>     | <b>Length/Å</b> |                |
| Dy1                      | N1              | 2.541(3)        |                |
| Dy1                      | N2              | 2.528(3)        |                |
| Dy1                      | O1              | 2.348(2)        |                |
| Dy1                      | O2              | 2.337(2)        |                |
| Dy1                      | O3 <sup>1</sup> | 2.300(2)        |                |
| Dy1                      | O4 <sup>1</sup> | 2.334(2)        |                |
| Dy1                      | O5              | 2.316(2)        |                |
| Dy1                      | O6              | 2.352(2)        |                |
| <sup>1</sup> -X,+Y,1/2+Z |                 |                 |                |
| <b>Atom</b>              | <b>Atom</b>     | <b>Atom</b>     | <b>Angle/°</b> |
| N2                       | Dy1             | N1              | 63.64(8)       |
| O1                       | Dy1             | N1              | 70.90(9)       |
| O1                       | Dy1             | N2              | 107.85(9)      |
| O1                       | Dy1             | O6              | 149.04(8)      |
| O2                       | Dy1             | N1              | 110.75(8)      |
| O2                       | Dy1             | N2              | 74.88(9)       |
| O2                       | Dy1             | O1              | 72.75(8)       |
| O2                       | Dy1             | O6              | 81.76(7)       |
| O3 <sup>1</sup>          | Dy1             | N1              | 146.56(8)      |
| O3 <sup>1</sup>          | Dy1             | N2              | 147.24(8)      |
| O3 <sup>1</sup>          | Dy1             | O1              | 82.79(10)      |
| O3 <sup>1</sup>          | Dy1             | O2              | 79.26(9)       |
| O3 <sup>1</sup>          | Dy1             | O4 <sup>1</sup> | 72.95(8)       |
| O3 <sup>1</sup>          | Dy1             | O5              | 118.01(9)      |
| O3 <sup>1</sup>          | Dy1             | O6              | 75.33(8)       |
| O4 <sup>1</sup>          | Dy1             | N1              | 80.26(8)       |
| O4 <sup>1</sup>          | Dy1             | N2              | 139.36(8)      |
| O4 <sup>1</sup>          | Dy1             | O1              | 74.62(9)       |
| O4 <sup>1</sup>          | Dy1             | O2              | 139.21(8)      |
| O4 <sup>1</sup>          | Dy1             | O6              | 118.00(8)      |
| O5                       | Dy1             | N1              | 73.52(8)       |
| O5                       | Dy1             | N2              | 75.38(8)       |
| O5                       | Dy1             | O1              | 137.43(8)      |

|                          |             |                 |                |
|--------------------------|-------------|-----------------|----------------|
| O5                       | Dy1         | O2              | 143.44(8)      |
| O5                       | Dy1         | O4 <sup>1</sup> | 77.04(8)       |
| O5                       | Dy1         | O6              | 73.15(7)       |
| O6                       | Dy1         | N1              | 136.43(8)      |
| O6                       | Dy1         | N2              | 81.31(8)       |
| <sup>1</sup> -X,+Y,1/2+Z |             |                 |                |
| <b>Compound 6</b>        |             |                 |                |
| <b>Atom</b>              | <b>Atom</b> | <b>Length/Å</b> |                |
| Dy1                      | N1          | 2.538(6)        |                |
| Dy1                      | N2          | 2.547(5)        |                |
| Dy1                      | O1          | 2.340(5)        |                |
| Dy1                      | O2          | 2.385(4)        |                |
| Dy1                      | O5          | 2.290(5)        |                |
| Dy1                      | O6          | 2.305(4)        |                |
| Dy1                      | O9          | 2.345(5)        |                |
| Dy1                      | O10         | 2.315(4)        |                |
| Dy2                      | N3          | 2.534(5)        |                |
| Dy2                      | N4          | 2.523(6)        |                |
| Dy2                      | O3          | 2.298(5)        |                |
| Dy2                      | O4          | 2.291(5)        |                |
| Dy2                      | O7          | 2.349(4)        |                |
| Dy2                      | O8          | 2.342(6)        |                |
| Dy2                      | O11         | 2.338(5)        |                |
| Dy2                      | O12         | 2.309(6)        |                |
| <b>Atom</b>              | <b>Atom</b> | <b>Atom</b>     | <b>Angle/°</b> |
| N1                       | Dy1         | N2              | 63.68(19)      |
| O1                       | Dy1         | N1              | 71.20(19)      |
| O1                       | Dy1         | N2              | 114.18(19)     |
| O1                       | Dy1         | O2              | 72.79(17)      |
| O1                       | Dy1         | O9              | 131.49(18)     |
| O2                       | Dy1         | N1              | 104.13(19)     |
| O2                       | Dy1         | N2              | 74.73(15)      |
| O5                       | Dy1         | N1              | 88.3(2)        |
| O5                       | Dy1         | N2              | 141.89(17)     |
| O5                       | Dy1         | O1              | 76.3(2)        |
| O5                       | Dy1         | O2              | 140.51(16)     |
| O5                       | Dy1         | O6              | 73.56(16)      |
| O5                       | Dy1         | O9              | 72.60(18)      |
| O5                       | Dy1         | O10             | 109.43(18)     |

|     |     |     |            |
|-----|-----|-----|------------|
| O6  | Dy1 | N1  | 150.40(18) |
| O6  | Dy1 | N2  | 142.03(15) |
| O6  | Dy1 | O1  | 81.71(18)  |
| O6  | Dy1 | O2  | 78.13(15)  |
| O6  | Dy1 | O9  | 122.26(18) |
| O6  | Dy1 | O10 | 76.08(16)  |
| O9  | Dy1 | N1  | 71.6(2)    |
| O9  | Dy1 | N2  | 74.16(17)  |
| O9  | Dy1 | O2  | 146.87(15) |
| O10 | Dy1 | N1  | 132.94(17) |
| O10 | Dy1 | N2  | 77.57(16)  |
| O10 | Dy1 | O1  | 154.01(16) |
| O10 | Dy1 | O2  | 89.41(15)  |
| O10 | Dy1 | O9  | 73.02(16)  |
| N4  | Dy2 | N3  | 63.35(18)  |
| O3  | Dy2 | N3  | 138.71(16) |
| O3  | Dy2 | N4  | 157.16(18) |
| O3  | Dy2 | O7  | 75.73(15)  |
| O3  | Dy2 | O8  | 92.31(19)  |
| O3  | Dy2 | O11 | 78.19(17)  |
| O3  | Dy2 | O12 | 108.9(2)   |
| O4  | Dy2 | N3  | 147.98(18) |
| O4  | Dy2 | N4  | 85.22(19)  |
| O4  | Dy2 | O3  | 73.25(17)  |
| O4  | Dy2 | O7  | 130.8(2)   |
| O4  | Dy2 | O8  | 72.5(2)    |
| O4  | Dy2 | O11 | 122.1(2)   |
| O4  | Dy2 | O12 | 71.1(3)    |
| O7  | Dy2 | N3  | 72.71(16)  |
| O7  | Dy2 | N4  | 114.95(17) |
| O8  | Dy2 | N3  | 102.15(19) |
| O8  | Dy2 | N4  | 73.6(2)    |
| O8  | Dy2 | O7  | 71.63(16)  |
| O11 | Dy2 | N3  | 74.17(17)  |
| O11 | Dy2 | N4  | 120.98(19) |
| O11 | Dy2 | O7  | 86.81(15)  |
| O11 | Dy2 | O8  | 158.08(17) |
| O12 | Dy2 | N3  | 91.2(2)    |
| O12 | Dy2 | N4  | 69.8(2)    |

|     |     |     |           |
|-----|-----|-----|-----------|
| O12 | Dy2 | O7  | 156.7(2)  |
| O12 | Dy2 | O8  | 129.6(2)  |
| O12 | Dy2 | O11 | 72.33(19) |

**Table S2** The distances and angles between Dy( III ) ions.

|        | The intramolecular distances between Dy( III ) ions, Dy···Dy (Å) | The intermolecular distances between Dy( III ) ions, Dy···Dy (Å) | The angles of Dy-L-Dy (°) |
|--------|------------------------------------------------------------------|------------------------------------------------------------------|---------------------------|
| 1      | 7.5495(11)                                                       | 10.7388(12)/20.0870(12)                                          | 79.629(9)                 |
| 2      | 8.1410(6)                                                        | 16.6783(14)                                                      | 86.191(7)                 |
| 3      | 8.0983(11)                                                       | 10.0834(10)/13.9362(14)                                          | 86.045(11)                |
| 4      | 8.1673(6)                                                        | 11.2574(8)/14.3113(6)                                            | 86.167(6)                 |
| 4<br>a | 7.9012(8)                                                        | 11.8914(8)/11.7990(10)/11.8914 (10)                              | 83.876(8)                 |
| 5      | 8.0712(11)                                                       | 9.6058(6)/13.0524(11)                                            | 84.543(4)                 |
| 6      | 7.9973(7)                                                        | 10.5124(7)/17.3209(7)                                            | 84.072(6)                 |

**Table S3** Dy<sup>III</sup> ion geometry analysis by SHAPE 2.1 software.

| Configuration                                           | 1      |        | 2      |        |
|---------------------------------------------------------|--------|--------|--------|--------|
|                                                         | Dy1    | Dy2    | Dy1    | Dy1A   |
| Octagon ( $D_{8h}$ )                                    | 28.079 | 28.660 | 29.750 | 29.750 |
| Heptagonal pyramid ( $C_{7v}$ )                         | 23.666 | 23.925 | 22.935 | 22.935 |
| Hexagonal bipyramid ( $D_{6h}$ )                        | 15.754 | 15.549 | 14.544 | 14.544 |
| Cube ( $O_h$ )                                          | 8.465  | 7.896  | 8.106  | 8.106  |
| Square antiprism ( $D_{4d}$ )                           | 0.278  | 0.362  | 0.616  | 0.616  |
| Triangular dodecahedron ( $D_{2d}$ )                    | 2.197  | 1.907  | 2.147  | 2.147  |
| Johnson gyrobifastigium J26 ( $D_{2d}$ )                | 15.786 | 16.140 | 15.172 | 15.172 |
| Johnson elongated triangular bipyramid J14 ( $D_{3h}$ ) | 28.640 | 29.011 | 28.185 | 28.185 |
| Biaugmented trigonal prism J50 ( $C_{2v}$ )             | 2.856  | 2.814  | 2.600  | 2.600  |
| Biaugmented trigonal prism ( $C_{2v}$ )                 | 2.042  | 2.032  | 2.038  | 2.038  |
| Snub diphenoid J84 ( $D_{2d}$ )                         | 5.346  | 5.062  | 5.224  | 5.224  |
| Triakis tetrahedron ( $T_d$ )                           | 9.275  | 8.767  | 8.778  | 8.778  |
| Elongated trigonal bipyramid ( $D_{3h}$ )               | 23.759 | 23.948 | 23.747 | 23.747 |
| Configuration                                           | 3      |        | 4      |        |
|                                                         | Dy1    | Dy2    | Dy1    | Dy1A   |
| Octagon ( $D_{8h}$ )                                    | 30.249 | 30.868 | 31.239 | 31.239 |
| Heptagonal pyramid ( $C_{7v}$ )                         | 22.179 | 23.142 | 22.297 | 22.297 |
| Hexagonal bipyramid ( $D_{6h}$ )                        | 16.485 | 14.012 | 14.741 | 14.741 |
| Cube ( $O_h$ )                                          | 9.943  | 7.133  | 7.825  | 7.825  |
| Square antiprism ( $D_{4d}$ )                           | 0.413  | 0.919  | 1.695  | 1.695  |
| Triangular dodecahedron ( $D_{2d}$ )                    | 2.424  | 1.455  | 0.827  | 0.827  |
| Johnson gyrobifastigium J26 ( $D_{2d}$ )                | 16.543 | 15.746 | 15.366 | 15.366 |

|                                                         |        |        |        |        |
|---------------------------------------------------------|--------|--------|--------|--------|
| Johnson elongated triangular bipyramid J14 ( $D_{3h}$ ) | 27.856 | 28.371 | 27.036 | 27.036 |
| Biaugmented trigonal prism J50 ( $C_{2v}$ )             | 3.067  | 2.936  | 2.543  | 2.543  |
| Biaugmented trigonal prism ( $C_{2v}$ )                 | 2.397  | 2.286  | 1.859  | 1.859  |
| Snub diphenoid J84 ( $D_{2d}$ )                         | 5.423  | 4.831  | 4.026  | 4.026  |
| Triakis tetrahedron ( $T_d$ )                           | 10.746 | 7.916  | 8.680  | 8.680  |
| Elongated trigonal bipyramid ( $D_{3h}$ )               | 23.993 | 23.939 | 23.702 | 23.702 |

| Configuration                                           | 4a     |        | 5      |        |
|---------------------------------------------------------|--------|--------|--------|--------|
|                                                         | Dy1    | Dy2    | Dy1    | Dy1A   |
| Octagon ( $D_{8h}$ )                                    | 30.494 | 31.924 | 30.096 | 30.096 |
| Heptagonal pyramid ( $C_{7v}$ )                         | 22.433 | 22.979 | 21.717 | 21.717 |
| Hexagonal bipyramid ( $D_{6h}$ )                        | 13.495 | 14.085 | 16.114 | 16.114 |
| Cube ( $O_h$ )                                          | 6.744  | 7.199  | 9.274  | 9.274  |
| Square antiprism ( $D_{4d}$ )                           | 1.338  | 0.996  | 0.438  | 0.438  |
| Triangular dodecahedron ( $D_{2d}$ )                    | 1.637  | 1.409  | 2.386  | 2.386  |
| Johnson gyrobifastigium J26 ( $D_{2d}$ )                | 14.647 | 15.857 | 16.958 | 16.958 |
| Johnson elongated triangular bipyramid J14 ( $D_{3h}$ ) | 26.327 | 28.500 | 28.457 | 28.457 |
| Biaugmented trigonal prism J50 ( $C_{2v}$ )             | 2.827  | 2.977  | 2.922  | 2.922  |
| Biaugmented trigonal prism ( $C_{2v}$ )                 | 2.031  | 2.592  | 2.362  | 2.362  |
| Snub diphenoid J84 ( $D_{2d}$ )                         | 5.189  | 4.355  | 5.333  | 5.333  |
| Triakis tetrahedron ( $T_d$ )                           | 7.547  | 7.907  | 9.954  | 9.954  |
| Elongated trigonal bipyramid ( $D_{3h}$ )               | 22.800 | 24.353 | 24.127 | 24.127 |

| Configuration                                           | 6      |        |
|---------------------------------------------------------|--------|--------|
|                                                         | Dy1    | Dy2    |
| Octagon ( $D_{8h}$ )                                    | 31.380 | 32.895 |
| Heptagonal pyramid ( $C_{7v}$ )                         | 22.712 | 23.471 |
| Hexagonal bipyramid ( $D_{6h}$ )                        | 14.702 | 11.680 |
| Cube ( $O_h$ )                                          | 7.569  | 4.771  |
| Square antiprism ( $D_{4d}$ )                           | 0.993  | 2.231  |
| Triangular dodecahedron ( $D_{2d}$ )                    | 1.085  | 1.099  |
| Johnson gyrobifastigium J26 ( $D_{2d}$ )                | 16.482 | 15.651 |
| Johnson elongated triangular bipyramid J14 ( $D_{3h}$ ) | 28.131 | 27.597 |
| Biaugmented trigonal prism J50 ( $C_{2v}$ )             | 2.961  | 4.041  |
| Biaugmented trigonal prism ( $C_{2v}$ )                 | 2.296  | 3.499  |
| Snub diphenoid J84 ( $D_{2d}$ )                         | 4.280  | 5.019  |
| Triakis tetrahedron ( $T_d$ )                           | 8.318  | 5.626  |
| Elongated trigonal bipyramid ( $D_{3h}$ )               | 23.888 | 24.396 |

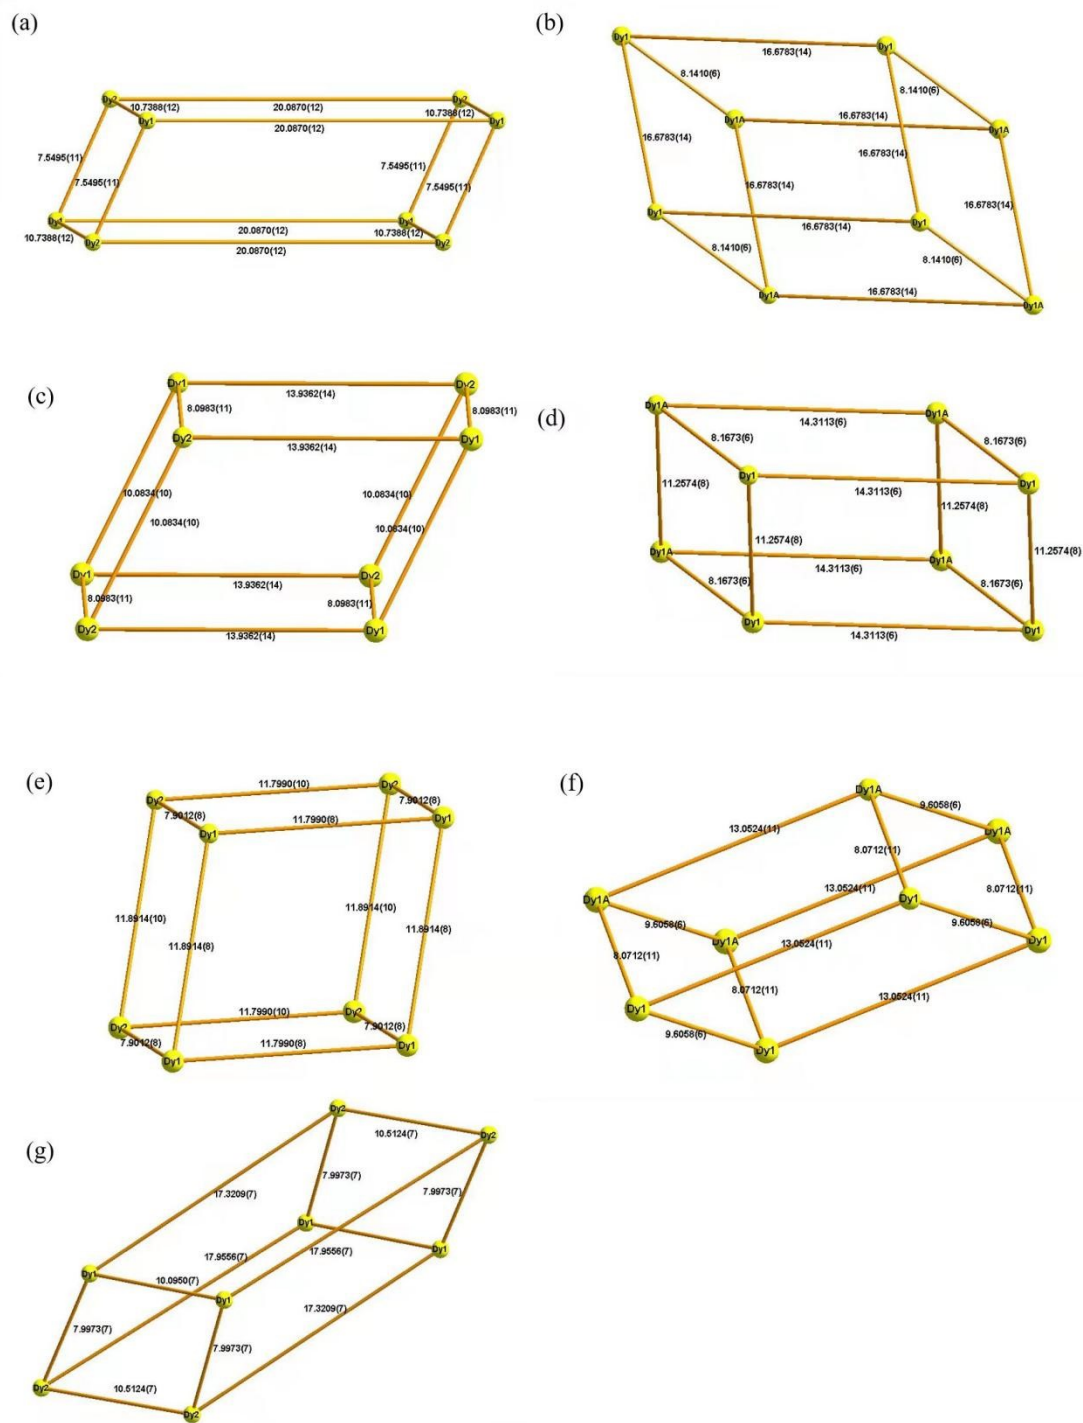

Figure S1. The intermolecular distances of Dy<sup>III</sup> units in **1-6** (a-g).

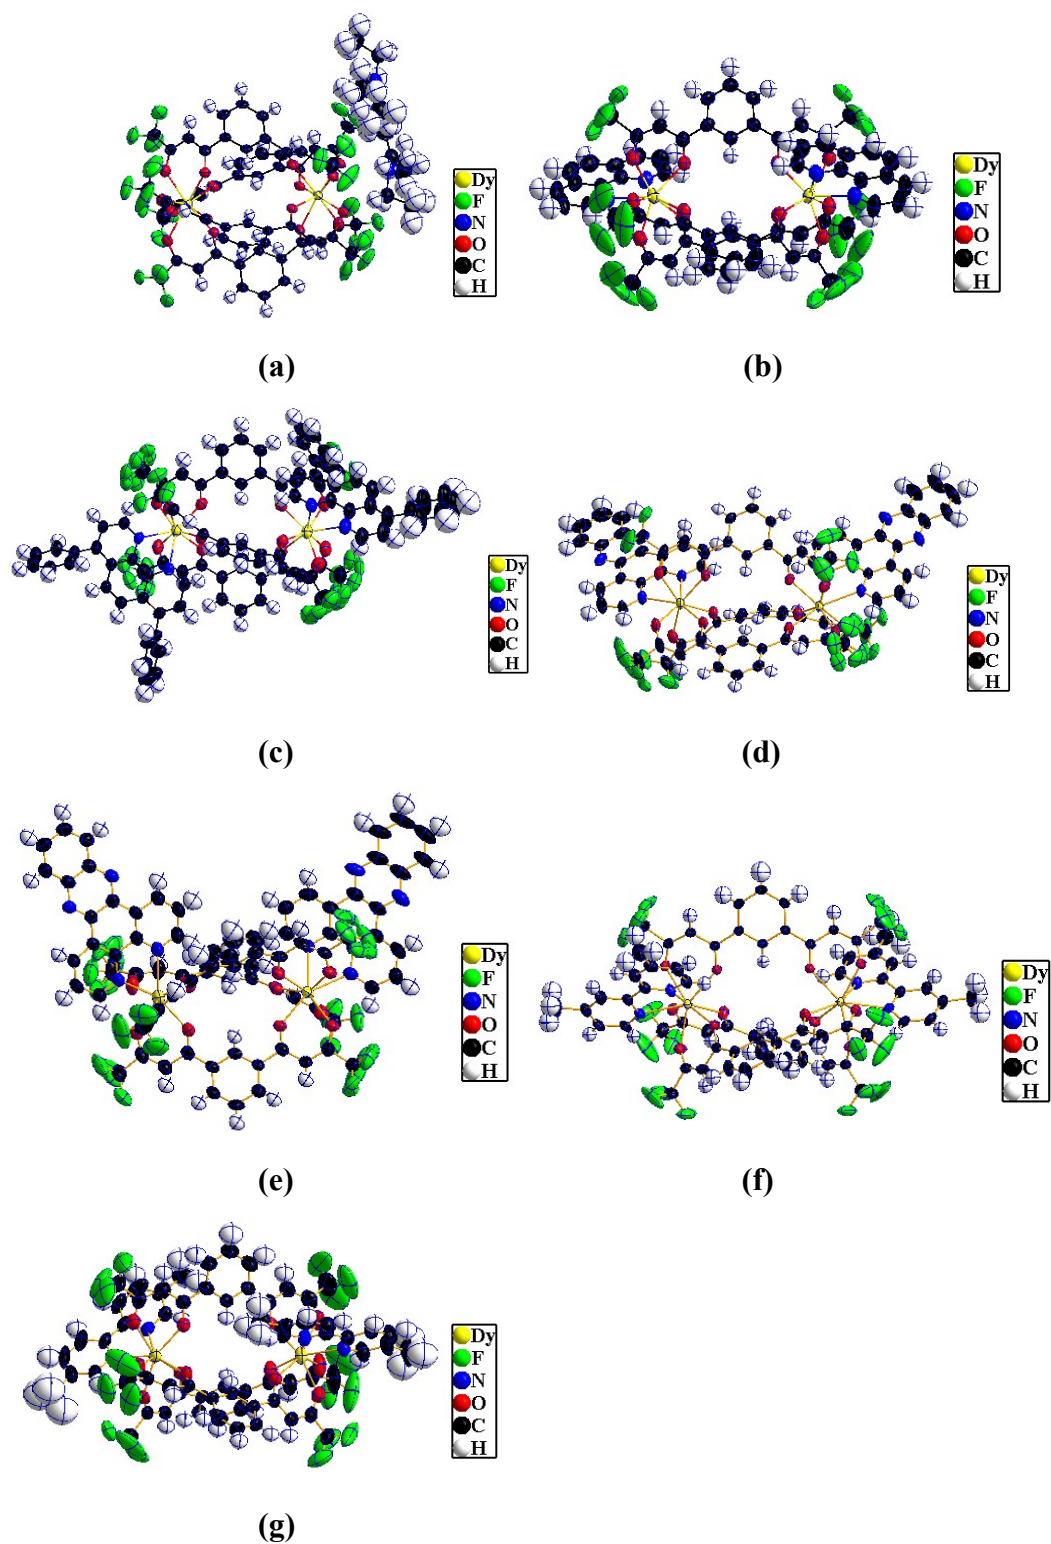

**Figure S2.** The asymmetric units of **1-6** (a-g) with the thermal ellipsoids for non-hydrogen atoms.



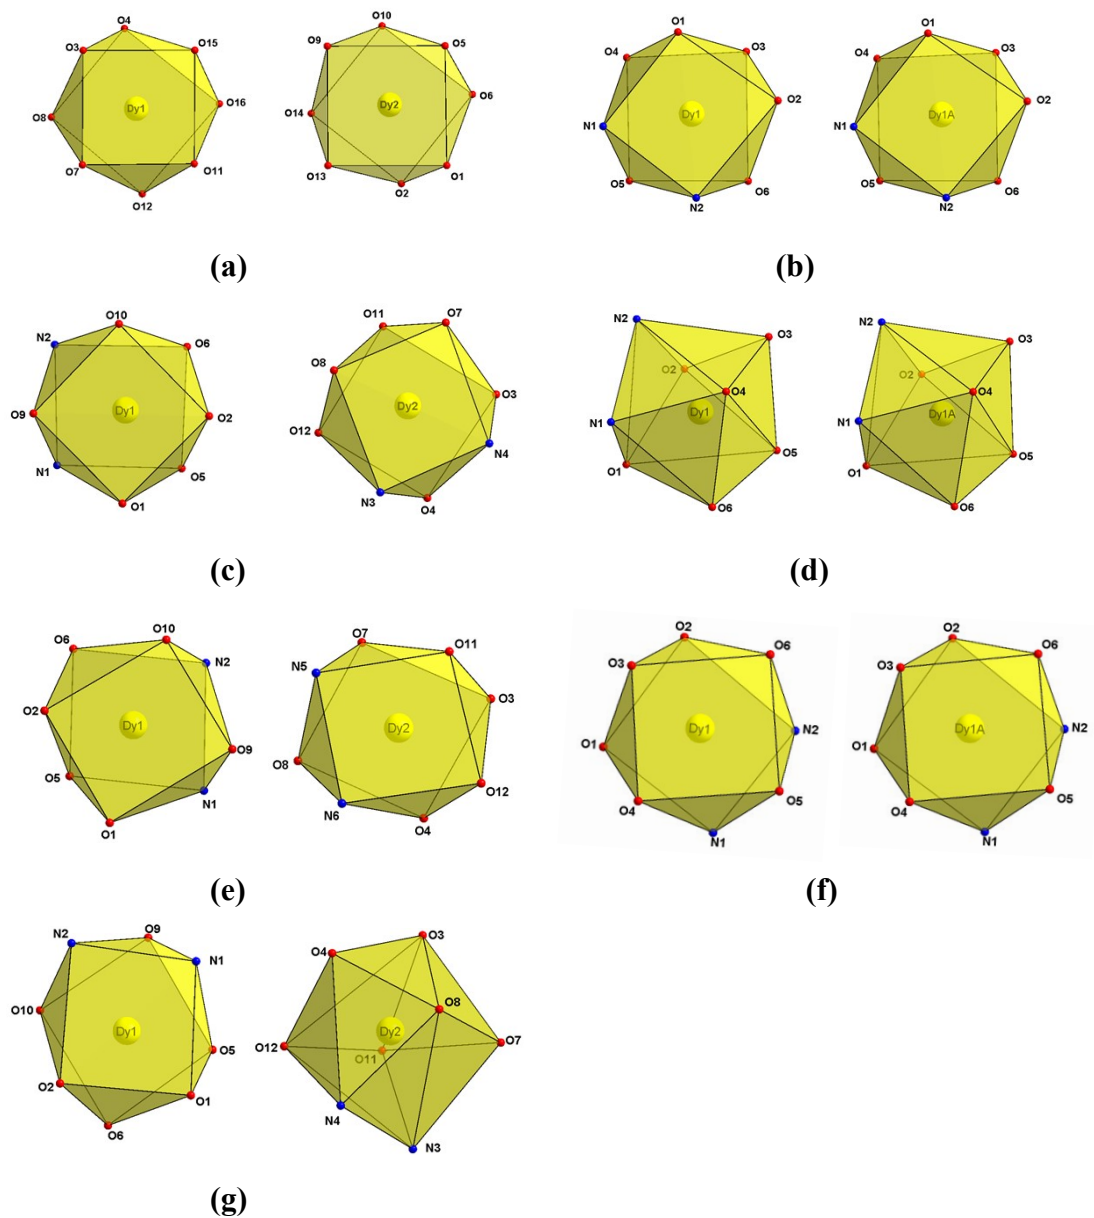

**Figure S3.** Local coordination geometries of the Dy<sup>III</sup> ions for 1-6 (a-g).

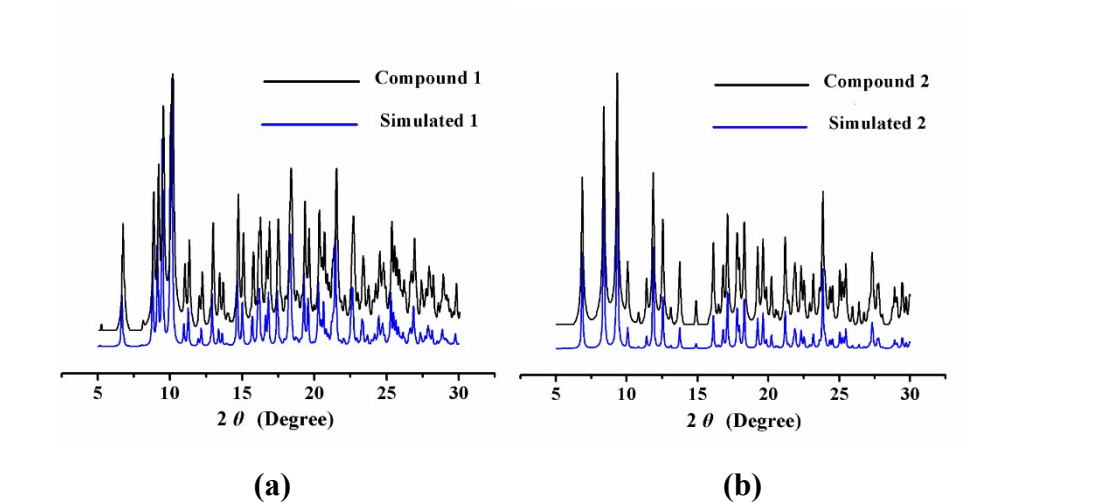

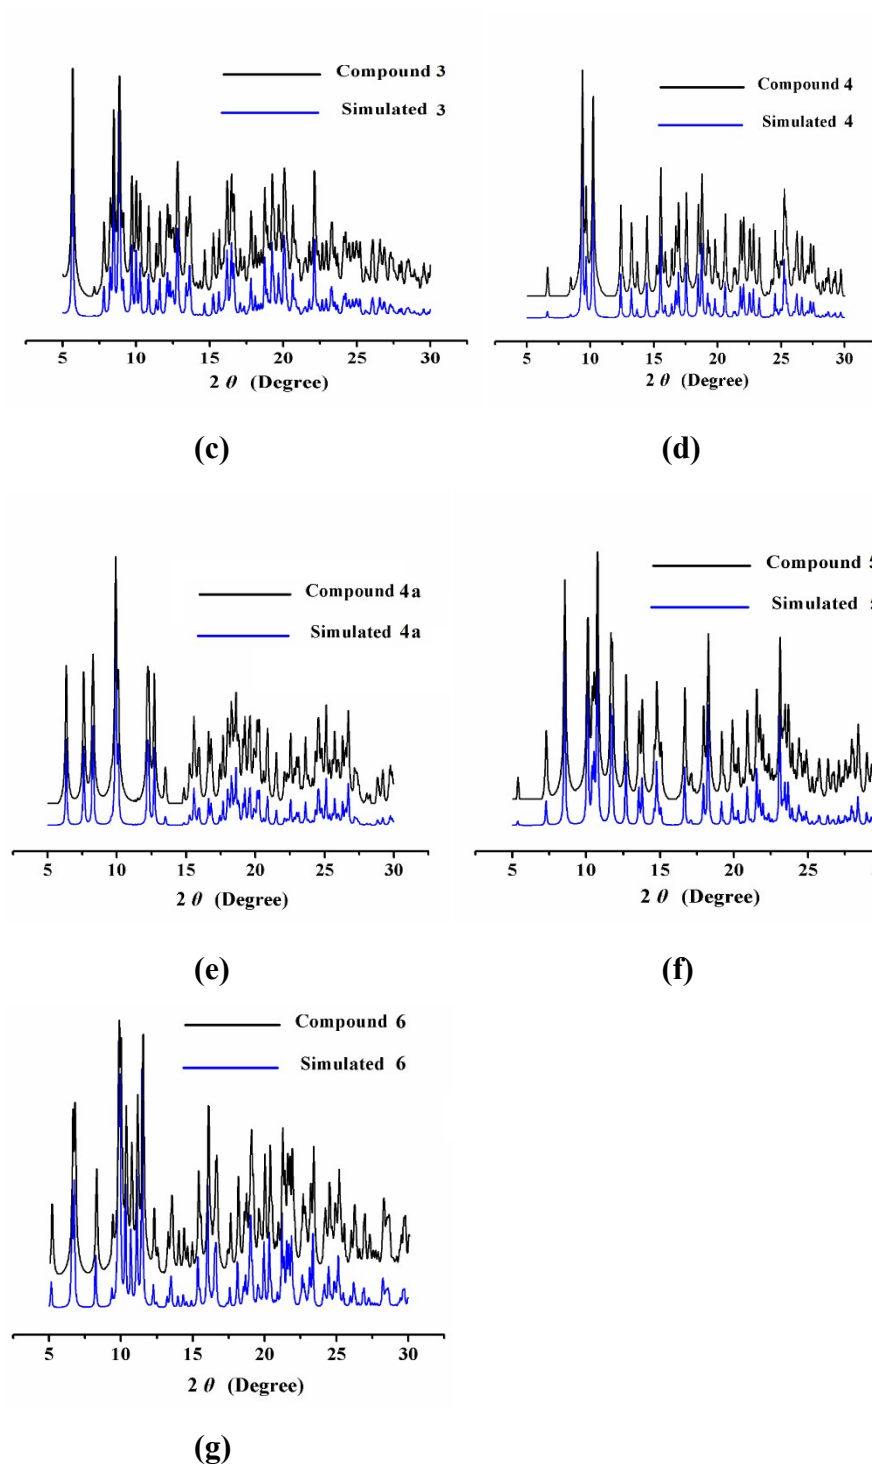

**Figure S4.** PXRD curves of 1-6 (a-g).

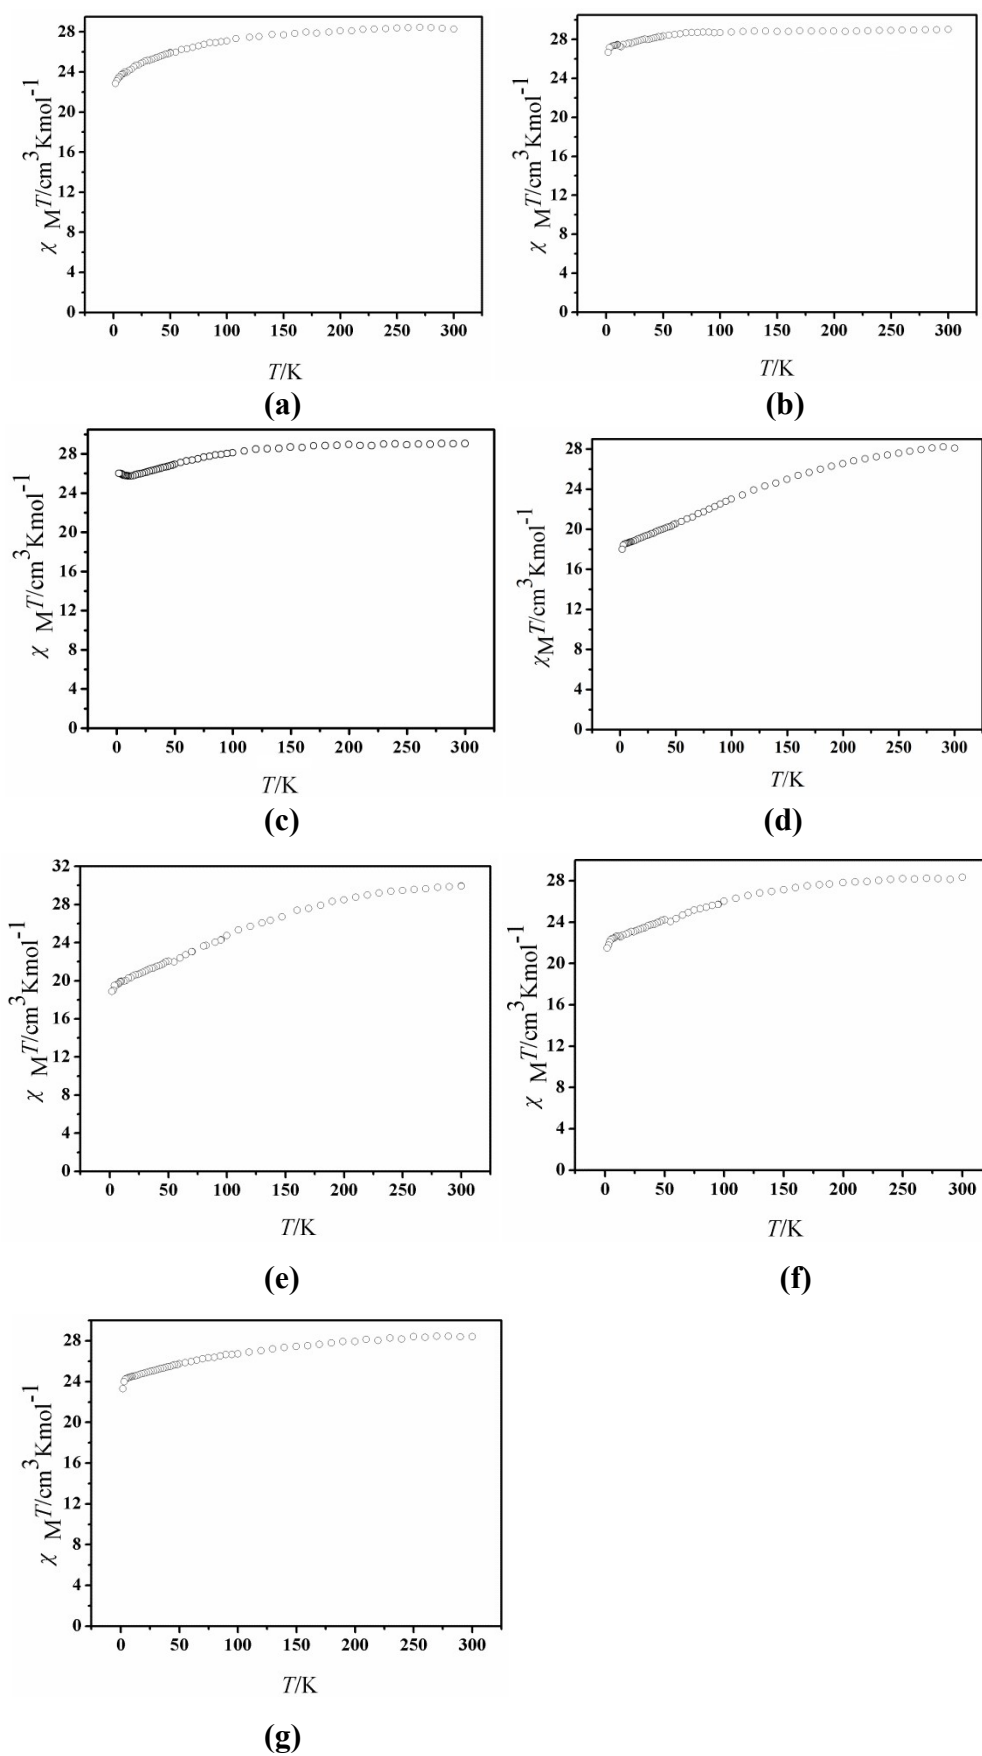

**Figure S5.** Temperature dependence of  $\chi_M T$  measured at 1 KOe for 1-6 (a-g), respectively.

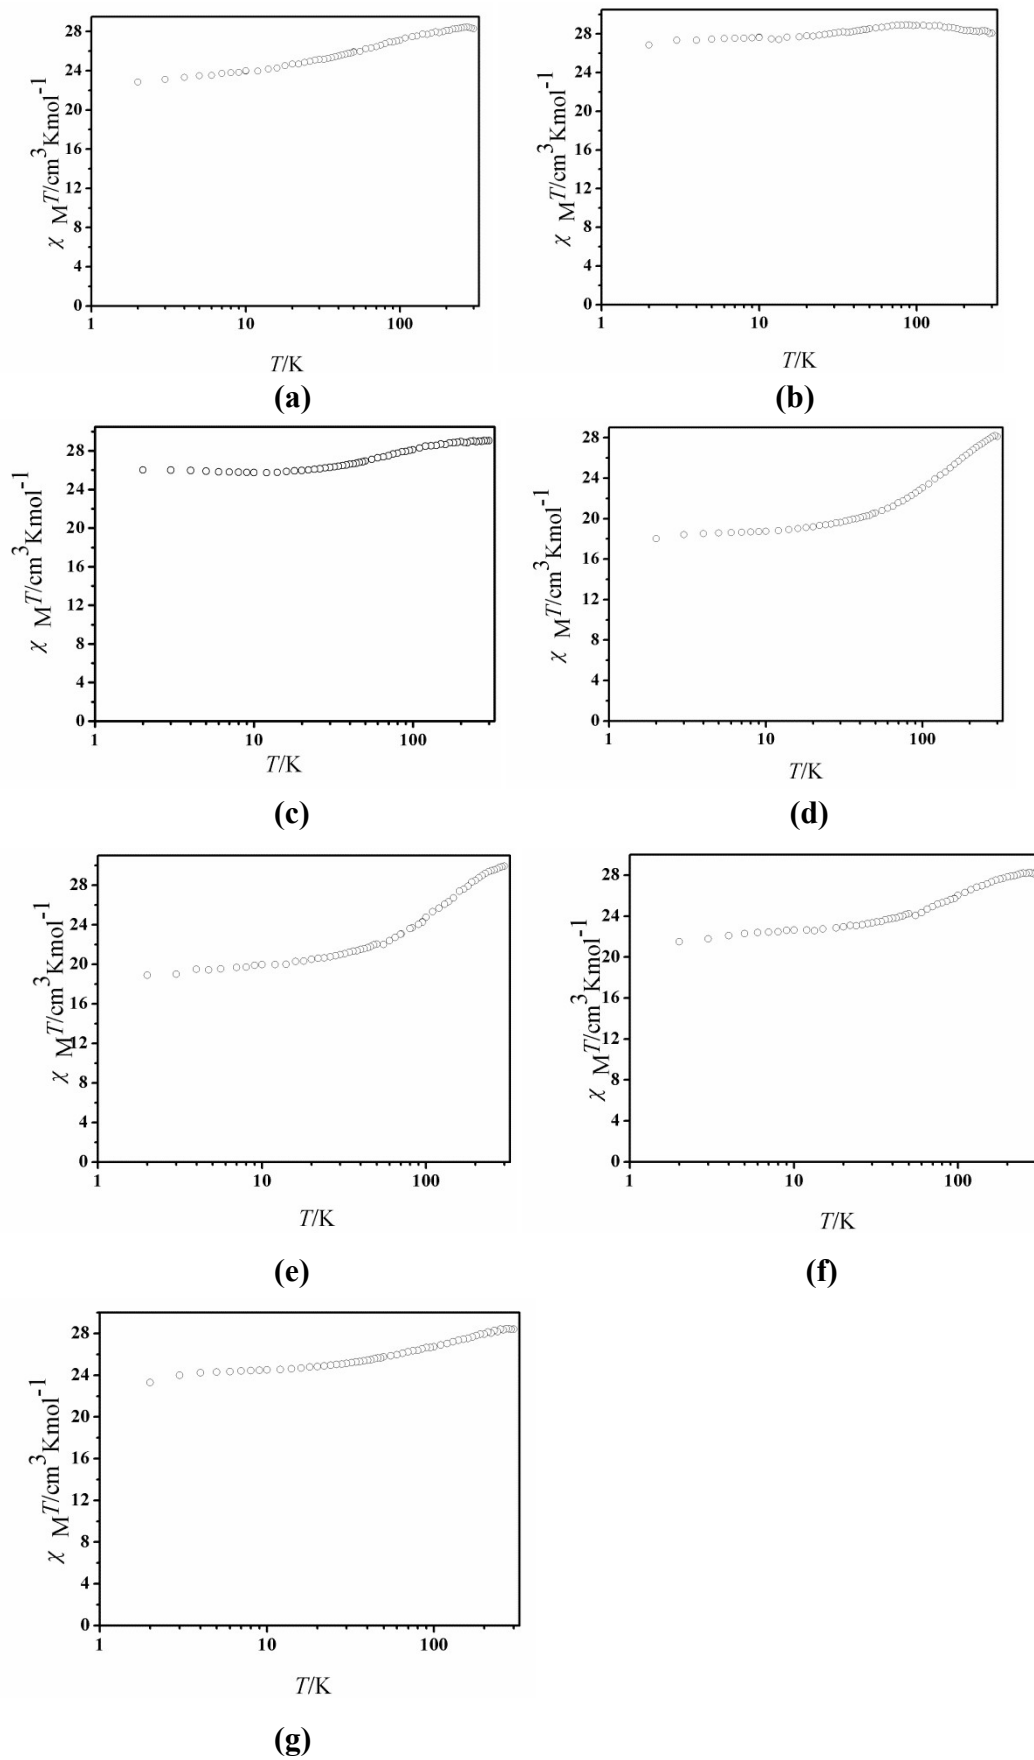

**Figure S6.** The graphical representations of  $\chi_M T$  vs  $\log T$  at 1 KOe for 1-6 (a-g), respectively.

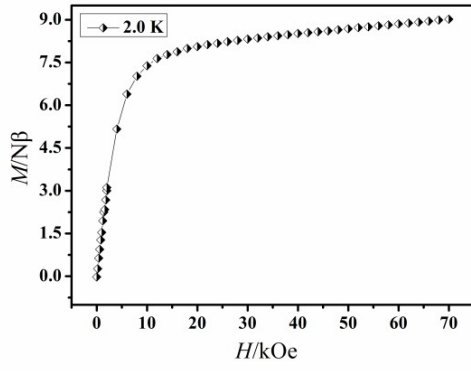

(a)

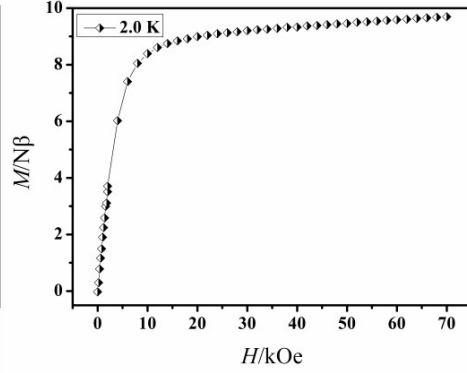

(b)

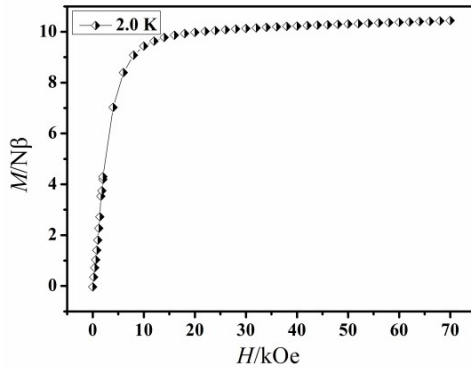

(c)

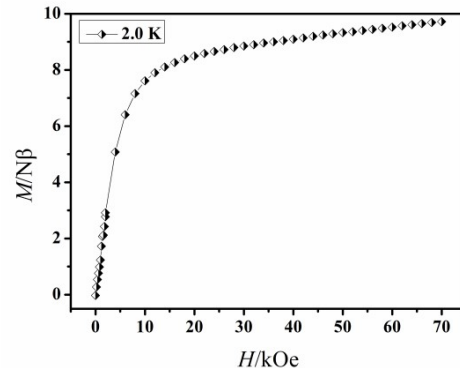

(d)

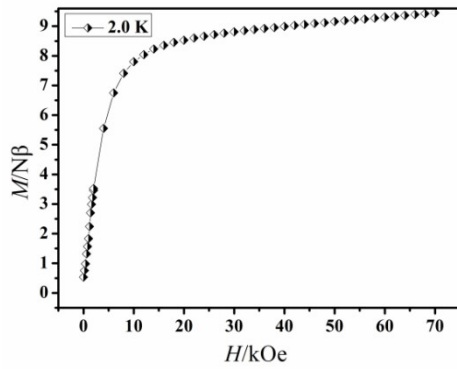

(e)

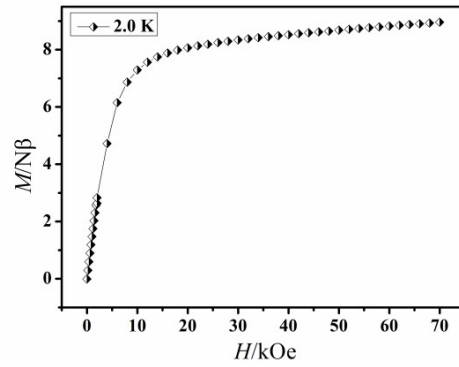

(f)

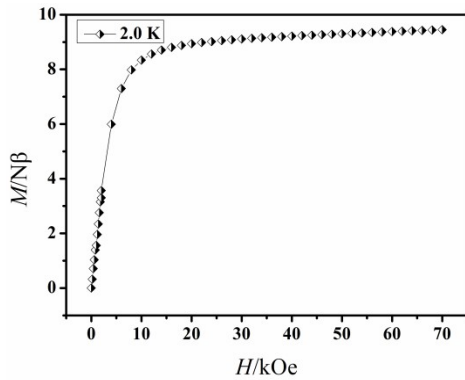

(g)

Figure S7.  $M(H)$  plots for 1-6 (a-g), respectively.

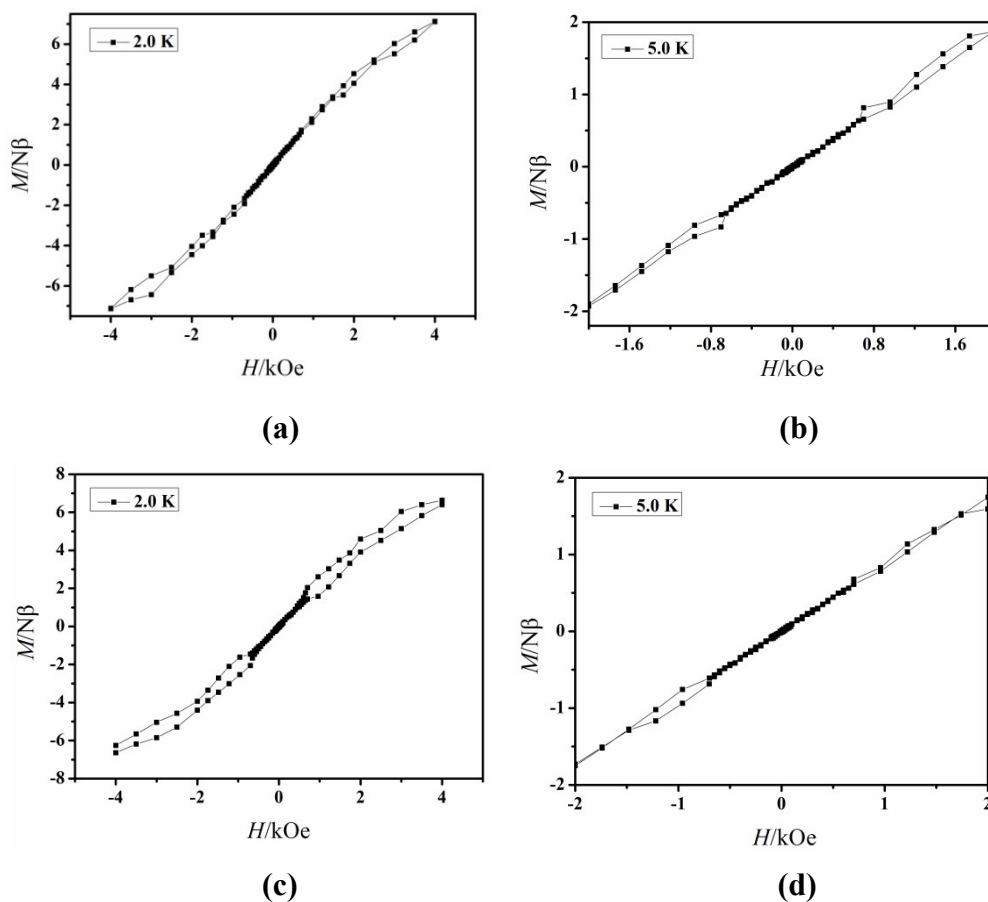

**Figure S8.** Magnetic hysteresis loops for **2** (a, b) at 2.0 K and 5.0 K. Magnetic hysteresis loops for **3** (c, d) at 2.0 K and 5.0 K.

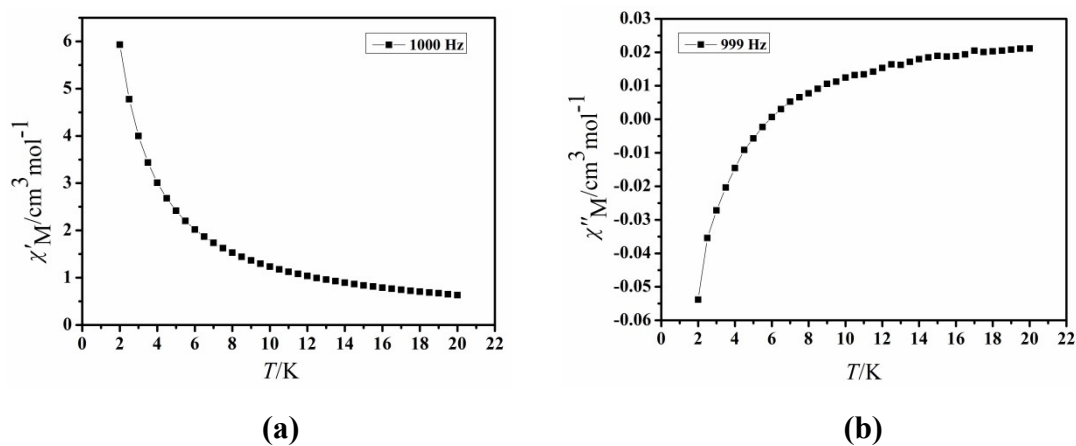

**Figure S9.** Temperature dependence of the in-phase ( $\chi'$ , a) and out-of-phase ( $\chi''$ , b) ac susceptibility signals under 0 Oe dc field for **1**.

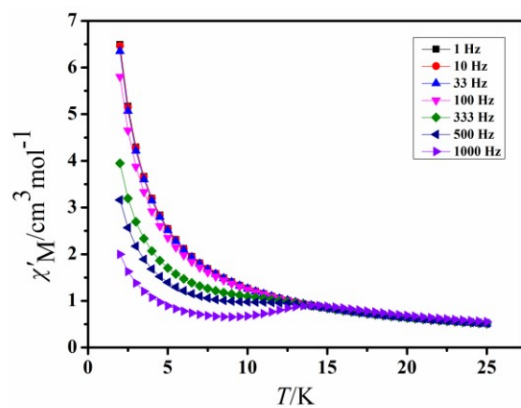

**Figure S10.** Temperature dependence of the in-phase ( $\chi'$ ) ac susceptibility signals under 0 Oe dc field for **2**.

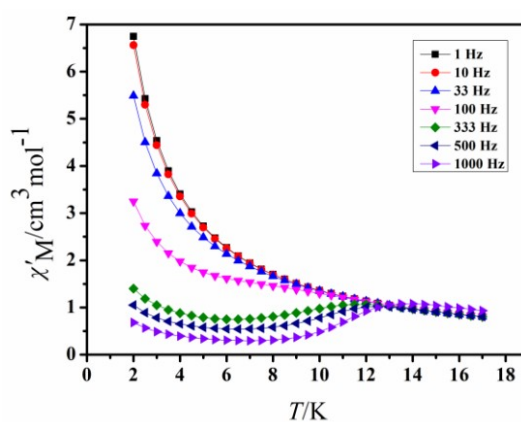

**Figure S11.** Temperature dependence of the in-phase ( $\chi'$ ) ac susceptibility signals under 0 Oe dc field for **3**.

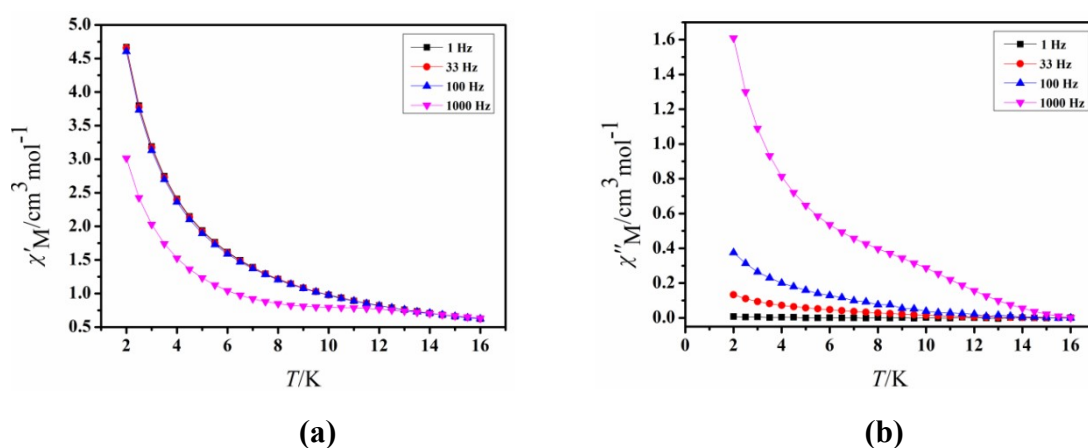

**Figure S12.** Temperature dependence of the in-phase ( $\chi'$ , a) and out-of-phase ( $\chi''$ , b) ac susceptibility signals under 0 Oe dc field for **4**.

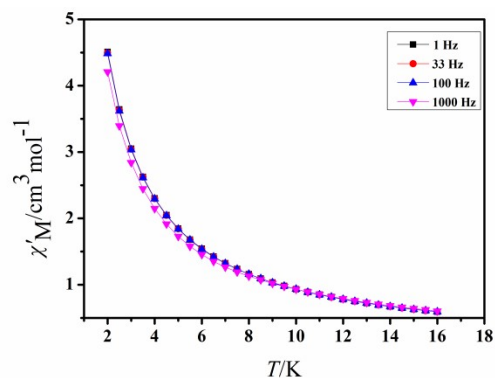

(a)

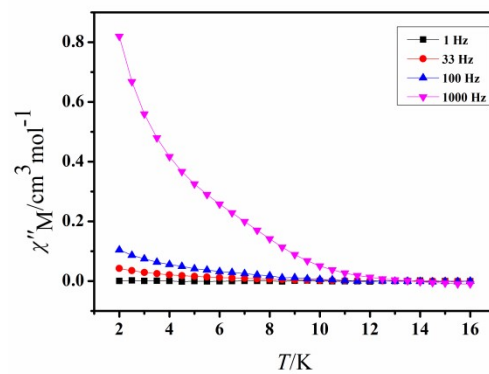

(b)

**Figure S13.** Temperature dependence of the in-phase ( $\chi'$ , a) and out-of-phase ( $\chi''$ , b) ac susceptibility signals under 0 Oe dc field for **4a**.

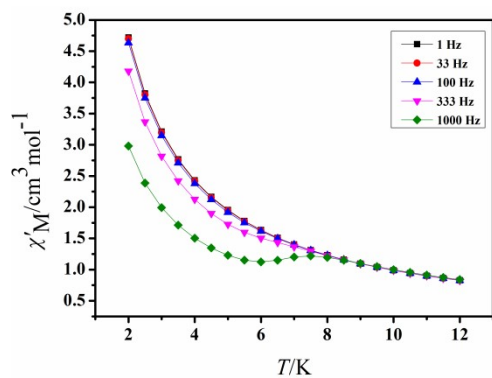

(a)

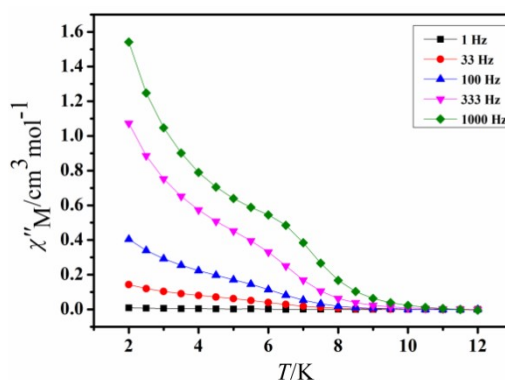

(b)

**Figure S14.** Temperature dependence of the in-phase ( $\chi'$ , a) and out-of-phase ( $\chi''$ , b) ac susceptibility signals under 0 Oe dc field for **5**.

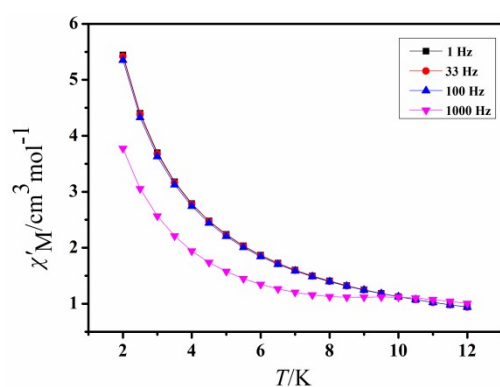

(a)

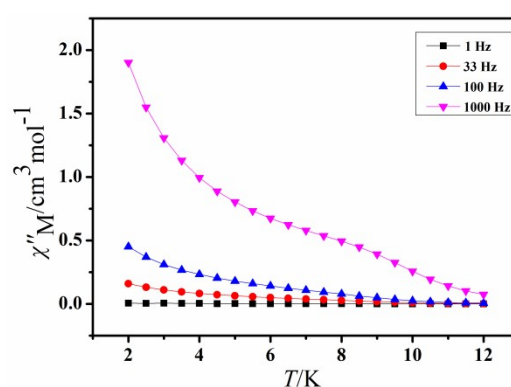

(b)

**Figure S15.** Temperature dependence of the in-phase ( $\chi'$ , a) and out-of-phase ( $\chi''$ , b) ac susceptibility signals under 0 Oe dc field for **6**.



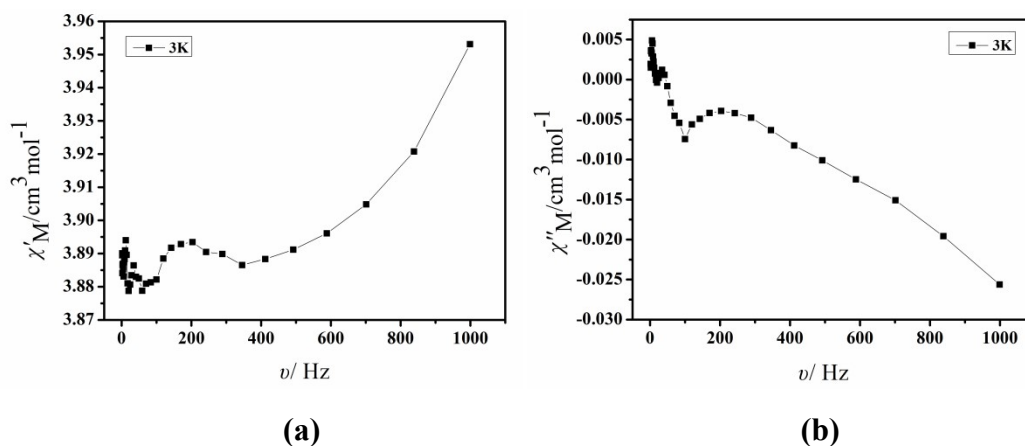

**Figure S16.** Plots of the frequency-dependent in-phase ( $\chi'$ , a) and out-of-phase ( $\chi''$ , b) ac susceptibility at 3.0 K for **1** under 0 Oe dc field.

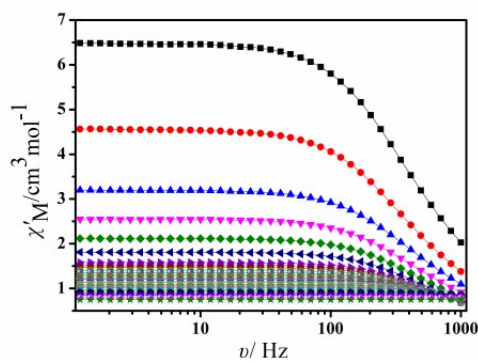

**Figure S17.** Plots of the frequency-dependent in-phase ( $\chi'$ ) ac susceptibility from 2.0 K to 17.0 K for **2** under 0 Oe dc field.

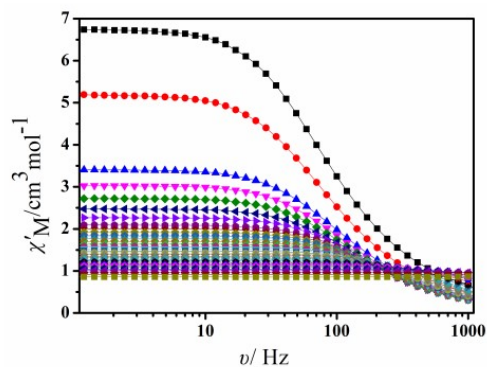

**Figure S18.** Plots of the frequency-dependent in-phase ( $\chi'$ ) ac susceptibility from 2.0 K to 16.0 K for **3** under 0 Oe dc field.

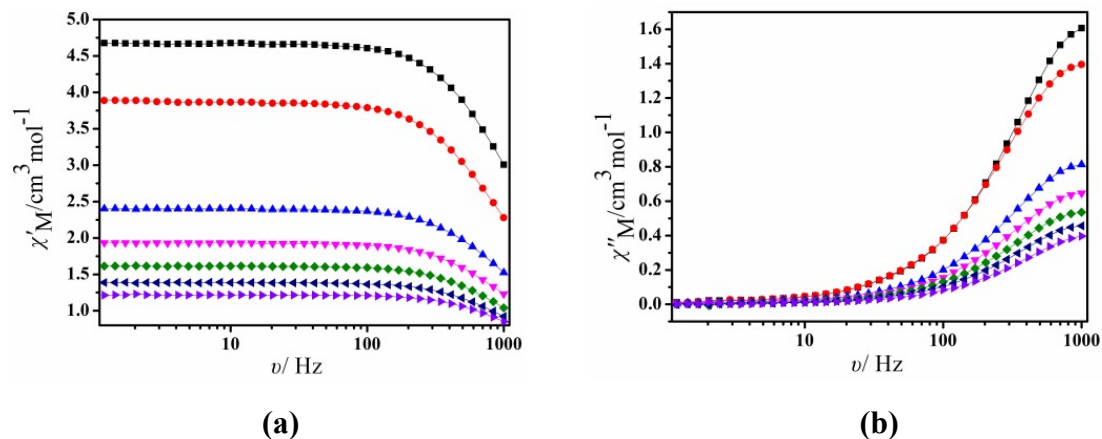

**Figure S19.** Plots of the frequency-dependent in-phase ( $\chi'$ , a) and out-of-phase ( $\chi''$ , b) ac susceptibility from 2.0 K to 8.0 K for **4** under 0 Oe dc field.

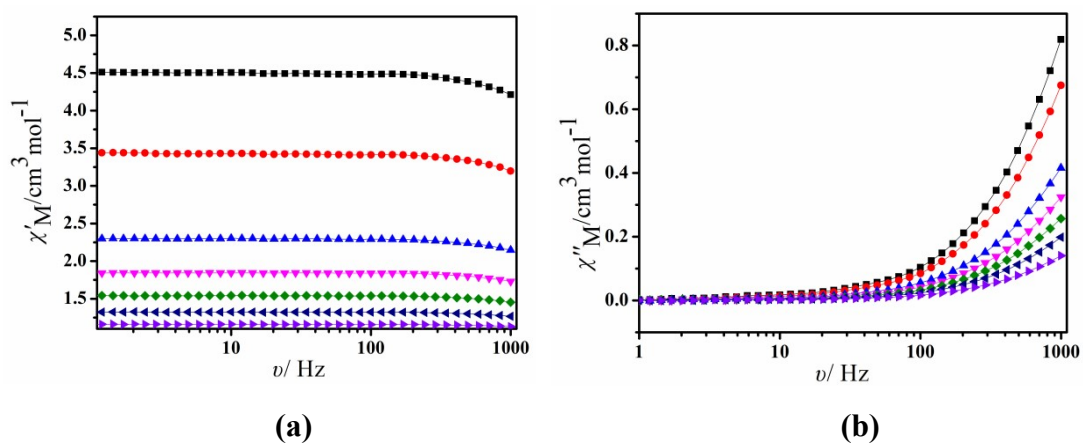

**Figure S20.** Plots of the frequency-dependent in-phase ( $\chi'$ , a) and out-of-phase ( $\chi''$ , b) ac susceptibility from 2.0 K to 8.0 K for **4a** under 0 Oe dc field.

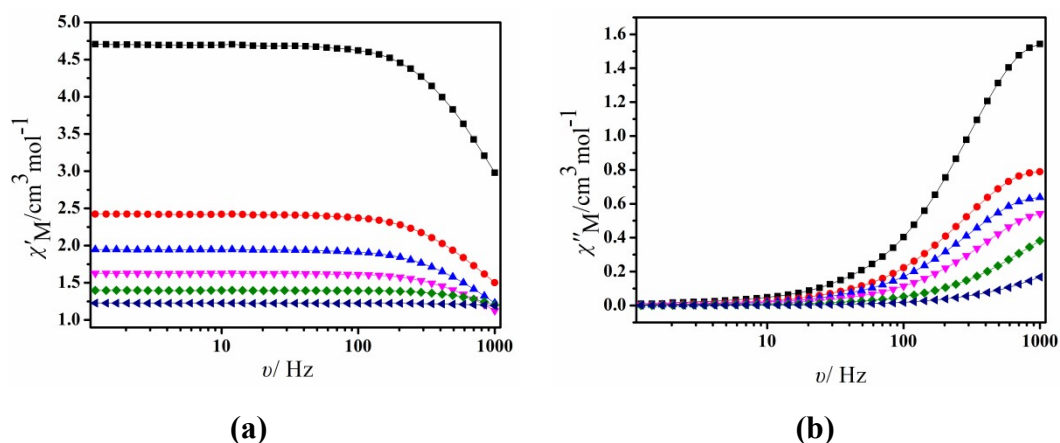

**Figure S21.** Plots of the frequency-dependent in-phase ( $\chi'$ , a) and out-of-phase ( $\chi''$ , b) ac susceptibility from 2.0 K to 8.0 K for **5** under 0 Oe dc field.

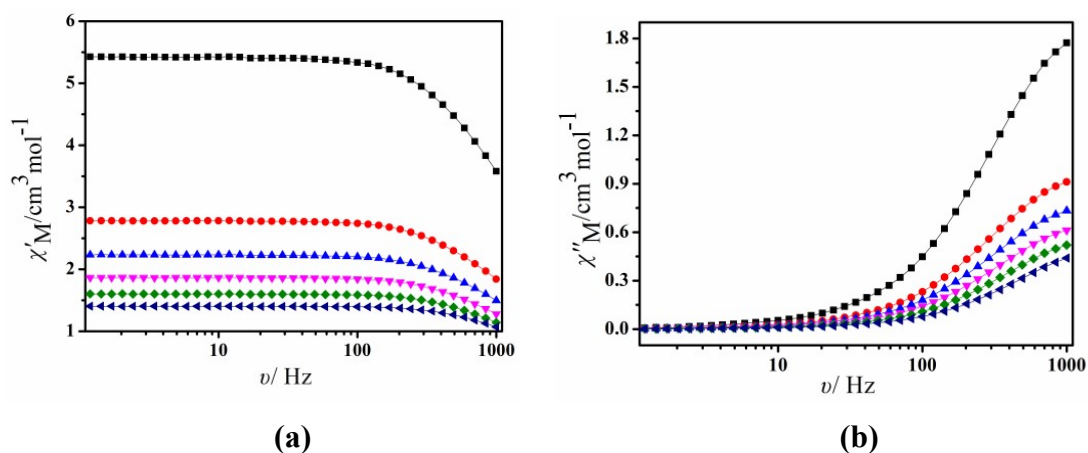

**Figure S22.** Plots of the frequency-dependent in-phase ( $\chi'$ , a) and out-of-phase ( $\chi''$ , b) ac susceptibility from 2.0 K to 8.0 K for **6** under 0 Oe dc field.

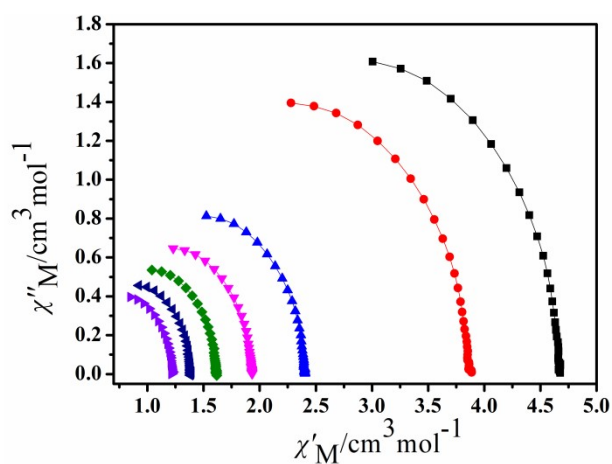

**Figure S23.** Cole–Cole plots for **4** from 2.0 K to 35.0 K using the ac susceptibility data under a zero applied dc field.

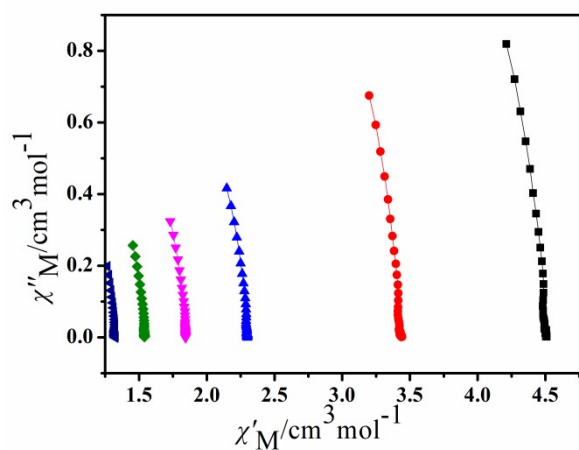

**Figure S24.** Cole–Cole plots for **4a** from 2.0 K to 8.0 K using the ac susceptibility data under a zero applied dc field.

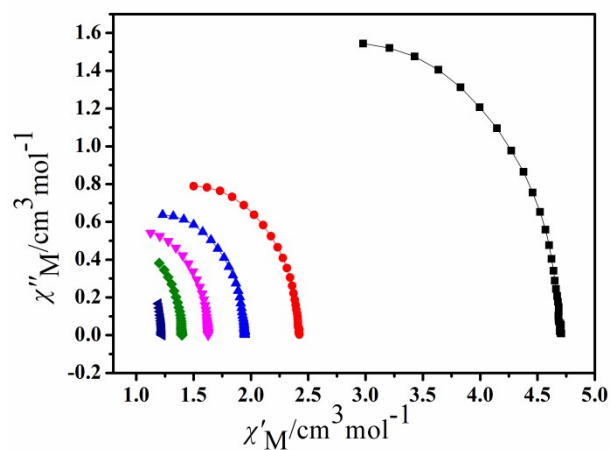

**Figure S25.** Cole–Cole plots for **5** from 2.0 K to 8.0 K using the ac susceptibility data under a zero applied dc field.

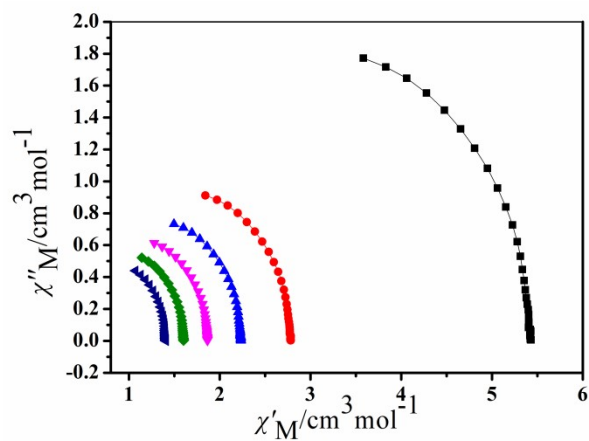

**Figure S26.** Cole–Cole plots for **6** from 2.0 K to 8.0 K using the ac susceptibility data under a zero applied dc field.

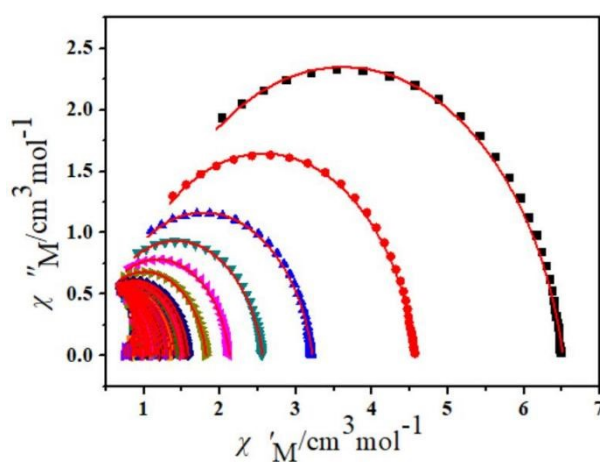

**Figure S27.** Cole–Cole diagrams with red solid lines as Debye fits for **2**.

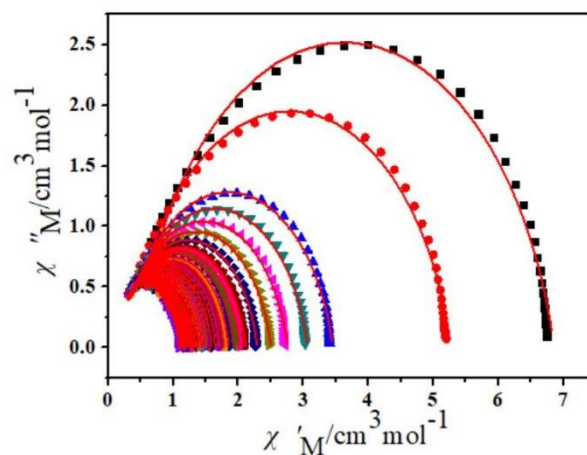

**Figure S28.** Cole–Cole diagrams with red solid lines as Debye fits for **3**.

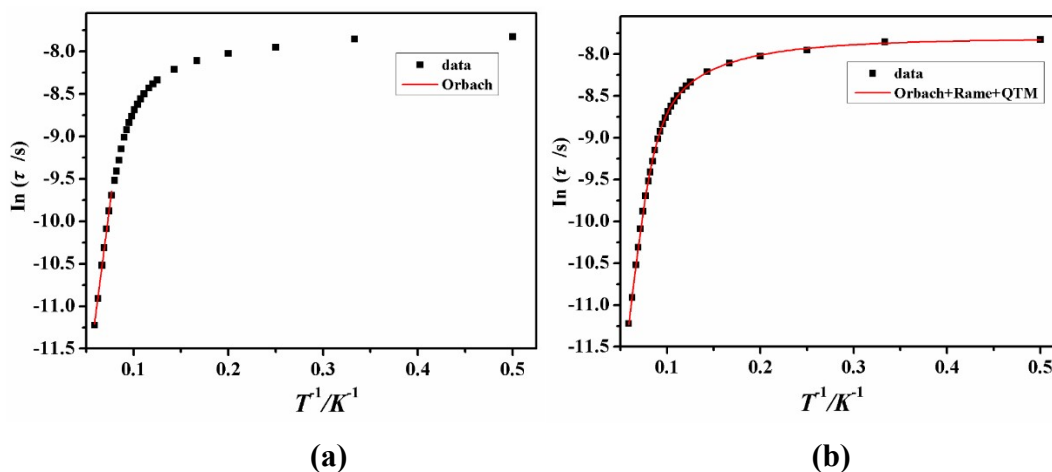

**Figure S29.** Fitting of frequency dependence of the relaxation time under 0 Oe dc field for **2** (the red line represents the simulation from the Orbach process (a). The red line represents the simulation from the Orbach process, the Raman process, and the QTM process (b)).

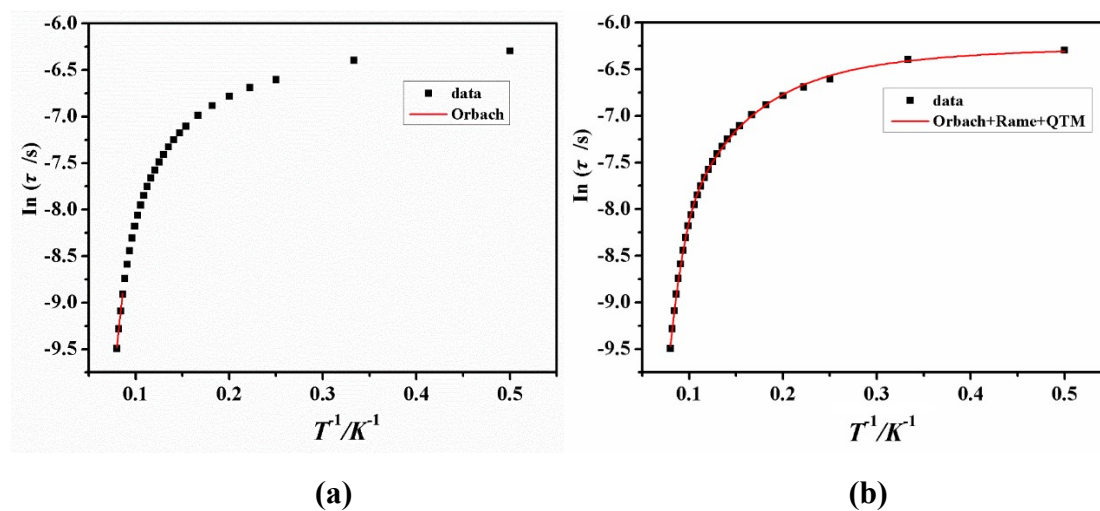

**Figure S30.** Fitting of frequency dependence of the relaxation time under 0 Oe dc

field for **3** (the red line represents the simulation from the Orbach process (a). The red line represents the simulation from the Orbach process, the Raman process, and the QTM process (b)).

#### 4. Relaxation fitting parameters of **2** and **3**

The magnetic susceptibility data of **2** and **3** under a zero dc field were described by the modified Debye functions:

$$\chi'(\omega) = \chi_s + (\chi_T - \chi_s) \frac{1 + (\omega\tau)^{1-\alpha} \sin\left(\frac{\pi}{2}\alpha\right)}{1 + 2(\omega\tau)^{1-\alpha} \sin\left(\frac{\pi}{2}\alpha\right) + (\omega\tau)^{(2-2\alpha)}}$$

$$\chi''(\omega) = (\chi_T - \chi_s) \frac{(\omega\tau)^{1-\alpha} \cos\left(\frac{\pi}{2}\alpha\right)}{1 + 2(\omega\tau)^{1-\alpha} \sin\left(\frac{\pi}{2}\alpha\right) + (\omega\tau)^{(2-2\alpha)}}$$

$$\chi''_{\omega=\tau^{-1}} = (\chi_T - \chi_s) \frac{\cos\left(\frac{\pi}{2}\alpha\right)}{2 + 2\sin\left(\frac{\pi}{2}\alpha\right)} = \frac{1}{2}(\chi_T - \chi_s) \tan\frac{\pi}{4}(1-\alpha)$$

**Table S4** Relaxation fitting parameters from Least-Squares Fitting of  $\chi(\omega)$  data for **2** under a zero applied dc field.

| $T$  | $\Delta\chi_1$ (cm <sup>3</sup> mol <sup>-1</sup> ) | $\Delta\chi_2$ (cm <sup>3</sup> mol <sup>-1</sup> ) | $\tau$ (s)   | $\alpha$     | Residual     |
|------|-----------------------------------------------------|-----------------------------------------------------|--------------|--------------|--------------|
| 2.0  | 0.720264E+00                                        | 0.651339E+01                                        | 0.399029E-03 | 0.131169E+00 | 0.831747E-01 |
| 3.0  | 0.565641E+00                                        | 0.457546E+01                                        | 0.425420E-03 | 0.123630E+00 | 0.283793E-01 |
| 4.0  | 0.351179E+00                                        | 0.321591E+01                                        | 0.352051E-03 | 0.129200E+00 | 0.223842E-01 |
| 5.0  | 0.279196E+00                                        | 0.256151E+01                                        | 0.327433E-03 | 0.125259E+00 | 0.148787E-01 |
| 6.0  | 0.233578E+00                                        | 0.212681E+01                                        | 0.301291E-03 | 0.117513E+00 | 0.104716E-01 |
| 7.0  | 0.198718E+00                                        | 0.181870E+01                                        | 0.271869E-03 | 0.107300E+00 | 0.725481E-02 |
| 8.0  | 0.171400E+00                                        | 0.158815E+01                                        | 0.239727E-03 | 0.929873E-01 | 0.501424E-02 |
| 8.3  | 0.163352E+00                                        | 0.153005E+01                                        | 0.229269E-03 | 0.884977E-01 | 0.436559E-02 |
| 8.6  | 0.155149E+00                                        | 0.147589E+01                                        | 0.218529E-03 | 0.839370E-01 | 0.387075E-02 |
| 9.0  | 0.142441E+00                                        | 0.140970E+01                                        | 0.203494E-03 | 0.781917E-01 | 0.311331E-02 |
| 9.3  | 0.132623E+00                                        | 0.136393E+01                                        | 0.191874E-03 | 0.740541E-01 | 0.265255E-02 |
| 9.6  | 0.122698E+00                                        | 0.132082E+01                                        | 0.180171E-03 | 0.697443E-01 | 0.220855E-02 |
| 9.9  | 0.114929E+00                                        | 0.128000E+01                                        | 0.168851E-03 | 0.644825E-01 | 0.189030E-02 |
| 10.2 | 0.102510E+00                                        | 0.124219E+01                                        | 0.156716E-03 | 0.609271E-01 | 0.148668E-02 |
| 10.5 | 0.937629E-01                                        | 0.120645E+01                                        | 0.145365E-03 | 0.557031E-01 | 0.122852E-02 |
| 10.8 | 0.811590E-01                                        | 0.117268E+01                                        | 0.133506E-03 | 0.520722E-01 | 0.979095E-03 |

|      |              |              |              |              |              |
|------|--------------|--------------|--------------|--------------|--------------|
| 11.1 | 0.686396E-01 | 0.114024E+01 | 0.122002E-03 | 0.476475E-01 | 0.790583E-03 |
| 11.5 | 0.461175E-01 | 0.110081E+01 | 0.106432E-03 | 0.442918E-01 | 0.573836E-03 |
| 11.8 | 0.197048E-01 | 0.106947E+01 | 0.934018E-04 | 0.416611E-01 | 0.451245E-03 |
| 12.2 | 0.824562E-05 | 0.104010E+01 | 0.820472E-04 | 0.369523E-01 | 0.338787E-03 |
| 12.5 | 0.170333E-04 | 0.101207E+01 | 0.735142E-04 | 0.279024E-01 | 0.300853E-03 |
| 13.0 | 0.399060E-04 | 0.973205E+00 | 0.615987E-04 | 0.154149E-01 | 0.283357E-03 |
| 13.5 | 0.184015E-03 | 0.936956E+00 | 0.513077E-04 | 0.659685E-03 | 0.249133E-03 |
| 14.0 | 0.381467E-15 | 0.904341E+00 | 0.414814E-04 | 0.840393E-03 | 0.313150E-03 |
| 14.5 | 0.743667E-27 | 0.873988E+00 | 0.333437E-04 | 0.880874E-03 | 0.406560E-03 |
| 15.0 | 0.342583E-26 | 0.845579E+00 | 0.269959E-04 | 0.362394E-12 | 0.454920E-03 |
| 16.0 | 0.363326E-26 | 0.794745E+00 | 0.182537E-04 | 0.527102E-12 | 0.448304E-03 |
| 17.0 | 0.368928E-26 | 0.749050E+00 | 0.133781E-04 | 0.809549E-12 | 0.477896E-03 |

**Table S5** Relaxation fitting parameters from Least-Squares Fitting of  $\chi(\omega)$  data for **3** under a zero applied dc field.

| $T$  | $\Delta\chi_1$ (cm <sup>3</sup> mol <sup>-1</sup> ) | $\Delta\chi_2$ (cm <sup>3</sup> mol <sup>-1</sup> ) | $\tau$ (s)   | $\alpha$     | Residual     |
|------|-----------------------------------------------------|-----------------------------------------------------|--------------|--------------|--------------|
| 2.0  | 0.428704E+00                                        | 0.685635E+01                                        | 0.184866E-02 | 0.152917E+00 | 0.319732E+00 |
| 3.0  | 0.317708E+00                                        | 0.526941E+01                                        | 0.180804E-02 | 0.149731E+00 | 0.183227E+00 |
| 4.0  | 0.228177E+00                                        | 0.345440E+01                                        | 0.135615E-02 | 0.144159E+00 | 0.725343E-01 |
| 4.5  | 0.205991E+00                                        | 0.306722E+01                                        | 0.124376E-02 | 0.138392E+00 | 0.538761E-01 |
| 5.0  | 0.187729E+00                                        | 0.275576E+01                                        | 0.113343E-02 | 0.131245E+00 | 0.399342E-01 |
| 5.5  | 0.172183E+00                                        | 0.250103E+01                                        | 0.102614E-02 | 0.123182E+00 | 0.294102E-01 |
| 6.0  | 0.158557E+00                                        | 0.228926E+01                                        | 0.922380E-03 | 0.114730E+00 | 0.213619E-01 |
| 6.5  | 0.146339E+00                                        | 0.210969E+01                                        | 0.822705E-03 | 0.106089E+00 | 0.153356E-01 |
| 6.8  | 0.139394E+00                                        | 0.201479E+01                                        | 0.765139E-03 | 0.101121E+00 | 0.123048E-01 |
| 7.1  | 0.132676E+00                                        | 0.192856E+01                                        | 0.710178E-03 | 0.964143E-01 | 0.999783E-02 |
| 7.4  | 0.126882E+00                                        | 0.184944E+01                                        | 0.657647E-03 | 0.915861E-01 | 0.812206E-02 |
| 7.7  | 0.121745E+00                                        | 0.177622E+01                                        | 0.607228E-03 | 0.867710E-01 | 0.671546E-02 |
| 8.0  | 0.117198E+00                                        | 0.170878E+01                                        | 0.559515E-03 | 0.822556E-01 | 0.548492E-02 |
| 8.3  | 0.113186E+00                                        | 0.164608E+01                                        | 0.513930E-03 | 0.778933E-01 | 0.450543E-02 |
| 8.6  | 0.109597E+00                                        | 0.158813E+01                                        | 0.470683E-03 | 0.739194E-01 | 0.371441E-02 |
| 8.9  | 0.107141E+00                                        | 0.153395E+01                                        | 0.429529E-03 | 0.702284E-01 | 0.307819E-02 |
| 9.2  | 0.104471E+00                                        | 0.148333E+01                                        | 0.389850E-03 | 0.671518E-01 | 0.251915E-02 |
| 9.5  | 0.103191E+00                                        | 0.143659E+01                                        | 0.352132E-03 | 0.645784E-01 | 0.200025E-02 |
| 9.8  | 0.103037E+00                                        | 0.139189E+01                                        | 0.315695E-03 | 0.619033E-01 | 0.177422E-02 |
| 10.1 | 0.103682E+00                                        | 0.135053E+01                                        | 0.280730E-03 | 0.598122E-01 | 0.147618E-02 |
| 10.4 | 0.105468E+00                                        | 0.131166E+01                                        | 0.247252E-03 | 0.585174E-01 | 0.118864E-02 |
| 10.7 | 0.110808E+00                                        | 0.127464E+01                                        | 0.215873E-03 | 0.567659E-01 | 0.104480E-02 |
| 11.0 | 0.117343E+00                                        | 0.123982E+01                                        | 0.186464E-03 | 0.552513E-01 | 0.856482E-03 |
| 11.3 | 0.127842E+00                                        | 0.120662E+01                                        | 0.159732E-03 | 0.532719E-01 | 0.718128E-03 |
| 11.6 | 0.138174E+00                                        | 0.117529E+01                                        | 0.135046E-03 | 0.518116E-01 | 0.628180E-03 |
| 11.9 | 0.147869E+00                                        | 0.114569E+01                                        | 0.112838E-03 | 0.509334E-01 | 0.479482E-03 |
| 12.2 | 0.156143E+00                                        | 0.111745E+01                                        | 0.930475E-04 | 0.502283E-01 | 0.404931E-03 |

|      |              |              |              |              |              |
|------|--------------|--------------|--------------|--------------|--------------|
| 12.5 | 0.158213E+00 | 0.109052E+01 | 0.754524E-04 | 0.499730E-01 | 0.310396E-03 |
| 13.0 | 0.126060E+00 | 0.104887E+01 | 0.497286E-04 | 0.523226E-01 | 0.185403E-03 |
| 13.5 | 0.215981E-11 | 0.101022E+01 | 0.288732E-04 | 0.541410E-01 | 0.139207E-03 |
| 14.0 | 0.329664E-11 | 0.910246E+00 | 0.970678E-05 | 0.335225E-15 | 0.171006E-03 |
| 15.0 | 0.595189E-11 | 0.856111E+00 | 0.419926E-05 | 0.457149E-15 | 0.312791E-03 |
| 16.0 | 0.595213E-11 | 0.856111E+00 | 0.419926E-05 | 0.685686E-15 | 0.312791E-03 |

### Theoretical methods and computational details:

Multiconfigurational *ab initio* calculations, including spin-orbit coupling (SOC), were performed on the experimental structures of the complexes here to explore their SMM properties. This type of calculation includes two steps:<sup>1</sup> 1) a set of spin eigenstates, are obtained by the state-averaged (SA) CASSCF method;<sup>2</sup> 2) the low-lying SOC states, i.e., Kramers doublets (KD) herein, are obtained by state interaction which is the diagonalization of the SOC matrix in the space spanned by the spin eigenstates from the first step. In the CASSCF step, the active space consisted of 9 electrons in 7 orbitals and all the spin eigenstates of 21 sextets were included. Due to the hardware limitation, other highly excited quartets and doublets were not considered. The step of state interaction were performed by the RASSI-SO module<sup>3</sup> with the SOC integrals from the AMFI method.<sup>4</sup> The ANO-RCC basis sets,<sup>5-7</sup> including VTZP for Dy and Lu, VDZ for C and H as well as VDZP for other atoms, were used. All the calculations were carried out with the MOLCAS@UU, a version of MOLCAS 8.0<sup>10,11</sup> which is freely distributed for academic users. The SINGLE ANISO module<sup>8,9</sup> developed by Chibotaru and et al, was used to obtain the *g*-tensors, transition magnetic moments and other parameters characterizing the magnetic anisotropy.

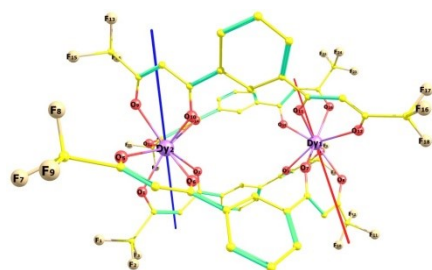

(a)

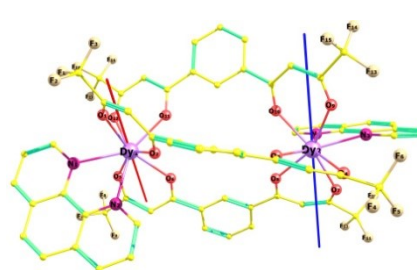

(b)



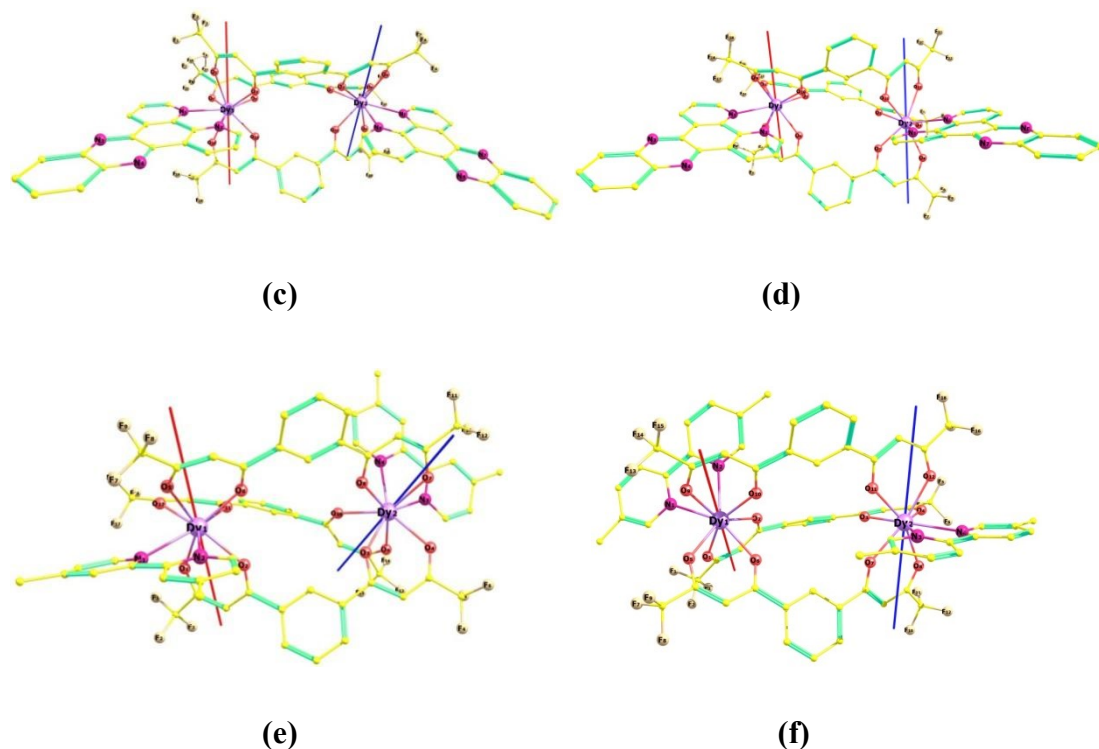

**Figure S31.** The *ab initio* magnetic easy axes of the two Dy<sup>III</sup> of **1** (a), **2** (b), **4** (c), **4a** (d), **5** (e) and **6** (f).

**Table S6** Calculated energy levels (cm<sup>-1</sup>), **g** (g<sub>x</sub>, g<sub>y</sub>, g<sub>z</sub>) tensors of the lowest eight KDs of individual Dy<sup>III</sup> fragments of complexes **1-6** using CASSCF/RASSI-SO with MOLCAS 8.2.

| <b>1-a</b>                | KD <sub>0</sub> | KD <sub>1</sub> | KD <sub>2</sub> | KD <sub>3</sub> | KD <sub>4</sub> | KD <sub>5</sub> | KD <sub>6</sub> | KD <sub>7</sub> |
|---------------------------|-----------------|-----------------|-----------------|-----------------|-----------------|-----------------|-----------------|-----------------|
| g <sub>x</sub>            | 4.027E-01       | 4.674E-01       | 3.789E-02       | 1.679E+00       | 1.045E+00       | 1.082E+00       | 1.979E-02       | 1.315E-04       |
| g <sub>y</sub>            | 4.217E+00       | 3.713E+00       | 7.729E-01       | 4.312E+00       | 6.078E+00       | 6.794E+00       | 1.118E-01       | 8.580E-04       |
| g <sub>z</sub>            | 1.606E+01       | 1.552E+01       | 1.661E+01       | 1.116E+01       | 7.204E+00       | 1.247E+01       | 1.721E+01       | 1.994E+01       |
| g <sub>xy</sub>           | 4.236E+00       | 3.742E+00       | 7.738E-01       | 4.627E+00       | 6.167E+00       | 6.879E+00       | 1.136E-01       | 8.681E-04       |
| E(KD)<br>cm <sup>-1</sup> | 0.000E+00       | 1.669E+01       | 1.547E+02       | 1.631E+02       | 1.776E+02       | 1.949E+02       | 2.512E+02       | 6.740E+02       |
| <b>1-b</b>                | KD <sub>0</sub> | KD <sub>1</sub> | KD <sub>2</sub> | KD <sub>3</sub> | KD <sub>4</sub> | KD <sub>5</sub> | KD <sub>6</sub> | KD <sub>7</sub> |
| g <sub>x</sub>            | 1.146E-01       | 1.184E-01       | 1.368E+00       | 2.585E+00       | 3.123E+00       | 3.613E-01       | 5.339E-02       | 1.606E-04       |
| g <sub>y</sub>            | 4.333E-01       | 3.207E-01       | 2.071E+00       | 4.570E+00       | 5.328E+00       | 6.392E-01       | 1.008E+00       | 1.313E-03       |
| g <sub>z</sub>            | 1.957E+01       | 1.932E+01       | 1.678E+01       | 1.179E+01       | 1.171E+01       | 1.747E+01       | 1.618E+01       | 1.994E+01       |
| g <sub>xy</sub>           | 4.482E-01       | 3.418E-01       | 2.482E+00       | 5.250E+00       | 6.176E+00       | 7.342E-01       | 1.009E+00       | 1.323E-03       |

|                           |                 |                 |                 |                 |                 |                 |                 |                 |
|---------------------------|-----------------|-----------------|-----------------|-----------------|-----------------|-----------------|-----------------|-----------------|
|                           | 01              | 01              | +00             | +00             | +00             | 01              | +00             | 03              |
| E(KD)<br>cm <sup>-1</sup> | 0.000E<br>+00   | 3.984E<br>+01   | 1.487E<br>+02   | 1.693E<br>+02   | 1.866E<br>+02   | 2.309E<br>+02   | 2.537E<br>+02   | 6.712E<br>+02   |
| <b>2-a</b>                | KD <sub>0</sub> | KD <sub>1</sub> | KD <sub>2</sub> | KD <sub>3</sub> | KD <sub>4</sub> | KD <sub>5</sub> | KD <sub>6</sub> | KD <sub>7</sub> |
| g <sub>x</sub>            | 3.349E-<br>02   | 7.197E-<br>01   | 1.028E<br>+00   | 7.751E<br>+00   | 2.894E-<br>01   | 1.075E<br>+00   | 1.546E-<br>01   | 1.151E-<br>02   |
| g <sub>y</sub>            | 5.822E-<br>02   | 1.465E<br>+00   | 1.309E<br>+00   | 4.648E<br>+00   | 1.758E<br>+00   | 1.813E<br>+00   | 3.554E-<br>01   | 2.678E-<br>02   |
| g <sub>z</sub>            | 1.960E<br>+01   | 1.748E<br>+01   | 1.150E<br>+01   | 8.323E<br>+00   | 1.347E<br>+01   | 1.571E<br>+01   | 1.874E<br>+01   | 1.972E<br>+01   |
| g <sub>xy</sub>           | 6.717E-<br>02   | 1.632E<br>+00   | 1.664E<br>+00   | 9.038E<br>+00   | 1.781E<br>+00   | 2.107E<br>+00   | 3.875E-<br>01   | 2.915E-<br>02   |
| E(KD)<br>cm <sup>-1</sup> | 0.000E<br>+00   | 8.694E<br>+01   | 1.341E<br>+02   | 1.606E<br>+02   | 2.011E<br>+02   | 2.461E<br>+02   | 3.207E<br>+02   | 4.460E<br>+02   |
| <b>2-b</b>                | KD <sub>0</sub> | KD <sub>1</sub> | KD <sub>2</sub> | KD <sub>3</sub> | KD <sub>4</sub> | KD <sub>5</sub> | KD <sub>6</sub> | KD <sub>7</sub> |
| g <sub>x</sub>            | 3.348E-<br>02   | 7.202E-<br>01   | 1.027E<br>+00   | 7.755E<br>+00   | 2.906E-<br>01   | 1.073E<br>+00   | 1.543E-<br>01   | 1.140E-<br>02   |
| g <sub>y</sub>            | 5.823E-<br>02   | 1.465E<br>+00   | 1.310E<br>+00   | 4.647E<br>+00   | 1.758E<br>+00   | 1.811E<br>+00   | 3.542E-<br>01   | 2.674E-<br>02   |
| g <sub>z</sub>            | 1.959E<br>+01   | 1.749E<br>+01   | 1.151E<br>+01   | 8.323E<br>+00   | 1.348E<br>+01   | 1.569E<br>+01   | 1.873E<br>+01   | 1.973E<br>+01   |
| g <sub>xy</sub>           | 6.717E-<br>02   | 1.633E<br>+00   | 1.664E<br>+00   | 9.040E<br>+00   | 1.781E<br>+00   | 2.105E<br>+00   | 3.863E-<br>01   | 2.907E-<br>02   |
| E(KD)<br>cm <sup>-1</sup> | 0.000E<br>+00   | 8.694E<br>+01   | 1.341E<br>+02   | 1.606E<br>+02   | 2.011E<br>+02   | 2.461E<br>+02   | 3.207E<br>+02   | 4.460E<br>+02   |
| <b>3-a</b>                | KD <sub>0</sub> | KD <sub>1</sub> | KD <sub>2</sub> | KD <sub>3</sub> | KD <sub>4</sub> | KD <sub>5</sub> | KD <sub>6</sub> | KD <sub>7</sub> |
| g <sub>x</sub>            | 4.999E-<br>03   | 8.130E-<br>01   | 4.048E<br>+00   | 1.964E<br>+00   | 3.136E-<br>01   | 1.215E-<br>01   | 2.003E-<br>02   | 4.642E-<br>03   |
| g <sub>y</sub>            | 1.208E-<br>02   | 1.550E<br>+00   | 5.479E<br>+00   | 2.297E<br>+00   | 9.201E-<br>01   | 1.497E-<br>01   | 8.880E-<br>02   | 9.270E-<br>03   |
| g <sub>z</sub>            | 1.953E<br>+01   | 1.540E<br>+01   | 1.065E<br>+01   | 9.700E<br>+00   | 1.340E<br>+01   | 1.744E<br>+01   | 1.928E<br>+01   | 1.984E<br>+01   |
| g <sub>xy</sub>           | 1.308E-<br>02   | 1.751E<br>+00   | 6.812E<br>+00   | 3.022E<br>+00   | 9.721E-<br>01   | 1.928E-<br>01   | 9.103E-<br>02   | 1.037E-<br>02   |
| E(KD)<br>cm <sup>-1</sup> | 0.000E<br>+00   | 1.229E<br>+02   | 1.616E<br>+02   | 1.897E<br>+02   | 2.292E<br>+02   | 2.805E<br>+02   | 3.422E<br>+02   | 4.741E<br>+02   |
| <b>3-b</b>                | KD <sub>0</sub> | KD <sub>1</sub> | KD <sub>2</sub> | KD <sub>3</sub> | KD <sub>4</sub> | KD <sub>5</sub> | KD <sub>6</sub> | KD <sub>7</sub> |
| g <sub>x</sub>            | 1.576E-<br>02   | 1.453E<br>+00   | 2.584E<br>+00   | 2.073E<br>+00   | 2.501E-<br>01   | 9.984E-<br>01   | 1.140E-<br>01   | 2.640E-<br>02   |
| g <sub>y</sub>            | 1.994E-<br>02   | 5.405E<br>+00   | 6.971E<br>+00   | 4.410E<br>+00   | 3.089E<br>+00   | 1.697E<br>+00   | 4.238E-<br>01   | 7.670E-<br>02   |
| g <sub>z</sub>            | 1.956E<br>+01   | 1.296E<br>+01   | 9.306E<br>+00   | 1.034E<br>+01   | 1.335E<br>+01   | 1.724E<br>+01   | 1.889E<br>+01   | 1.959E<br>+01   |

|                           |                 |                 |                 |                 |                 |                 |                 |                 |
|---------------------------|-----------------|-----------------|-----------------|-----------------|-----------------|-----------------|-----------------|-----------------|
| $g_{xy}$                  | 2.541E-02       | 5.597E+00       | 7.434E+00       | 4.873E+00       | 3.100E+00       | 1.968E+00       | 4.389E-01       | 8.112E-02       |
| E(KD)<br>cm <sup>-1</sup> | 0.000E+00       | 1.345E+02       | 1.544E+02       | 1.852E+02       | 2.408E+02       | 2.834E+02       | 3.648E+02       | 4.491E+02       |
| <b>4-a</b>                | KD <sub>0</sub> | KD <sub>1</sub> | KD <sub>2</sub> | KD <sub>3</sub> | KD <sub>4</sub> | KD <sub>5</sub> | KD <sub>6</sub> | KD <sub>7</sub> |
| $g_x$                     | 1.333E-02       | 8.927E-01       | 1.947E-01       | 2.489E+00       | 2.457E+00       | 2.080E-02       | 1.572E-01       | 1.911E-02       |
| $g_y$                     | 2.338E-02       | 1.209E+00       | 1.474E+00       | 3.953E+00       | 6.051E+00       | 7.566E-01       | 5.334E-01       | 3.897E-02       |
| $g_z$                     | 1.935E+01       | 1.459E+01       | 1.068E+01       | 1.498E+01       | 1.127E+01       | 1.727E+01       | 1.834E+01       | 1.986E+01       |
| $g_{xy}$                  | 2.691E-02       | 1.503E+00       | 1.487E+00       | 4.671E+00       | 6.531E+00       | 7.569E-01       | 5.560E-01       | 4.340E-02       |
| E(KD)<br>cm <sup>-1</sup> | 0.000E+00       | 1.176E+02       | 1.620E+02       | 1.880E+02       | 2.034E+02       | 2.865E+02       | 3.168E+02       | 4.566E+02       |
| <b>4-b</b>                | KD <sub>0</sub> | KD <sub>1</sub> | KD <sub>2</sub> | KD <sub>3</sub> | KD <sub>4</sub> | KD <sub>5</sub> | KD <sub>6</sub> | KD <sub>7</sub> |
| $g_x$                     | 1.215E-02       | 8.263E-01       | 3.543E-01       | 2.873E+00       | 2.073E+00       | 6.248E-03       | 1.595E-01       | 1.878E-02       |
| $g_y$                     | 2.147E-02       | 1.147E+00       | 1.560E+00       | 4.179E+00       | 5.453E+00       | 7.635E-01       | 5.484E-01       | 3.832E-02       |
| $g_z$                     | 1.936E+01       | 1.467E+01       | 1.085E+01       | 1.444E+01       | 1.150E+01       | 1.726E+01       | 1.835E+01       | 1.985E+01       |
| $g_{xy}$                  | 2.467E-02       | 1.414E+00       | 1.599E+00       | 5.071E+00       | 5.834E+00       | 7.635E-01       | 5.711E-01       | 4.267E-02       |
| E(KD)<br>cm <sup>-1</sup> | 0.000E+00       | 1.197E+02       | 1.654E+02       | 1.944E+02       | 2.080E+02       | 2.906E+02       | 3.209E+02       | 4.610E+02       |
| <b>4a-a</b>               | KD <sub>0</sub> | KD <sub>1</sub> | KD <sub>2</sub> | KD <sub>3</sub> | KD <sub>4</sub> | KD <sub>5</sub> | KD <sub>6</sub> | KD <sub>7</sub> |
| $g_x$                     | 3.063E-02       | 1.072E+00       | 4.353E-01       | 3.775E+00       | 3.185E-01       | 9.729E-01       | 2.278E-01       | 2.940E-02       |
| $g_y$                     | 3.509E-02       | 1.364E+00       | 2.235E+00       | 4.820E+00       | 2.883E+00       | 1.222E+00       | 4.865E-01       | 7.565E-02       |
| $g_z$                     | 1.952E+01       | 1.581E+01       | 1.119E+01       | 1.029E+01       | 1.243E+01       | 1.795E+01       | 1.886E+01       | 1.973E+01       |
| $g_{xy}$                  | 4.657E-02       | 1.735E+00       | 2.277E+00       | 6.123E+00       | 2.901E+00       | 1.562E+00       | 5.372E-01       | 8.116E-02       |
| E(KD)<br>cm <sup>-1</sup> | 0.000E+00       | 1.153E+02       | 1.568E+02       | 1.855E+02       | 2.218E+02       | 2.715E+02       | 3.573E+02       | 4.867E+02       |
| <b>4a-b</b>               | KD <sub>0</sub> | KD <sub>1</sub> | KD <sub>2</sub> | KD <sub>3</sub> | KD <sub>4</sub> | KD <sub>5</sub> | KD <sub>6</sub> | KD <sub>7</sub> |
| $g_x$                     | 4.323E-02       | 1.093E+00       | 4.090E+00       | 1.977E-01       | 1.067E+00       | 1.101E+00       | 1.704E-01       | 8.889E-02       |
| $g_y$                     | 8.943E-02       | 3.217E+00       | 5.357E+00       | 2.568E+00       | 2.544E+00       | 3.596E+00       | 2.544E-01       | 3.789E-01       |
| $g_z$                     | 1.944E+01       | 1.529E+01       | 9.210E+01       | 1.223E+01       | 1.204E+01       | 1.417E+01       | 1.820E+01       | 1.865E+01       |

|                           |                 |                 |                 |                 |                 |                 |                 |                 |
|---------------------------|-----------------|-----------------|-----------------|-----------------|-----------------|-----------------|-----------------|-----------------|
|                           | +01             | +01             | +00             | +01             | +01             | +01             | +01             | +01             |
| $g_{xy}$                  | 9.934E-02       | 3.398E+00       | 6.740E+00       | 2.576E+00       | 2.759E+00       | 3.761E+00       | 3.062E-01       | 3.892E-01       |
| E(KD)<br>cm <sup>-1</sup> | 0.000E+00       | 9.773E+01       | 1.391E+02       | 1.701E+02       | 2.130E+02       | 2.465E+02       | 4.130E+02       | 4.563E+02       |
| <b>5-a</b>                | KD <sub>0</sub> | KD <sub>1</sub> | KD <sub>2</sub> | KD <sub>3</sub> | KD <sub>4</sub> | KD <sub>5</sub> | KD <sub>6</sub> | KD <sub>7</sub> |
| $g_x$                     | 3.207E-02       | 4.853E-01       | 2.904E+00       | 4.486E+00       | 2.523E-01       | 2.127E-01       | 2.949E-02       | 5.097E-03       |
| $g_y$                     | 6.408E-02       | 1.339E+00       | 3.326E+00       | 5.530E+00       | 7.544E-01       | 3.469E-01       | 5.792E-02       | 1.543E-02       |
| $g_z$                     | 1.954E+01       | 1.777E+01       | 1.272E+01       | 9.764E+00       | 1.439E+01       | 1.677E+01       | 1.926E+01       | 1.975E+01       |
| $g_{xy}$                  | 7.165E-02       | 1.425E+00       | 4.415E+00       | 7.121E+00       | 7.955E-01       | 4.069E-01       | 6.500E-02       | 1.625E-02       |
| E(KD)<br>cm <sup>-1</sup> | 0.000E+00       | 8.327E+01       | 1.207E+02       | 1.523E+02       | 1.920E+02       | 2.462E+02       | 3.138E+02       | 4.045E+02       |
| <b>5-b</b>                | KD <sub>0</sub> | KD <sub>1</sub> | KD <sub>2</sub> | KD <sub>3</sub> | KD <sub>4</sub> | KD <sub>5</sub> | KD <sub>6</sub> | KD <sub>7</sub> |
| $g_x$                     | 3.203E-02       | 4.851E-01       | 2.902E+00       | 4.484E+00       | 2.525E-01       | 2.124E-01       | 2.969E-02       | 4.998E-03       |
| $g_y$                     | 6.410E-02       | 1.340E+00       | 3.327E+00       | 5.531E+00       | 7.542E-01       | 3.462E-01       | 5.824E-02       | 1.542E-02       |
| $g_z$                     | 1.953E+01       | 1.778E+01       | 1.274E+01       | 9.765E+00       | 1.439E+01       | 1.676E+01       | 1.925E+01       | 1.975E+01       |
| $g_{xy}$                  | 7.165E-02       | 1.425E+00       | 4.414E+00       | 7.121E+00       | 7.954E-01       | 4.062E-01       | 6.537E-02       | 1.621E-02       |
| E(KD)<br>cm <sup>-1</sup> | 0.000E+00       | 8.326E+01       | 1.207E+02       | 1.523E+02       | 1.920E+02       | 2.462E+02       | 3.138E+02       | 4.045E+02       |
| <b>6-a</b>                | KD <sub>0</sub> | KD <sub>1</sub> | KD <sub>2</sub> | KD <sub>3</sub> | KD <sub>4</sub> | KD <sub>5</sub> | KD <sub>6</sub> | KD <sub>7</sub> |
| $g_x$                     | 4.753E-03       | 4.829E-01       | 3.385E+00       | 1.506E+00       | 1.806E-01       | 9.011E-01       | 1.731E-01       | 8.953E-02       |
| $g_y$                     | 4.506E-02       | 1.865E+00       | 4.847E+00       | 5.175E+00       | 1.824E+00       | 2.065E+00       | 4.928E-01       | 6.331E-01       |
| $g_z$                     | 1.944E+01       | 1.711E+01       | 9.652E+00       | 1.124E+01       | 1.390E+01       | 1.585E+01       | 1.762E+01       | 1.807E+01       |
| $g_{xy}$                  | 4.531E-02       | 1.926E+00       | 5.912E+00       | 5.389E+00       | 1.833E+00       | 2.253E+00       | 5.223E-01       | 6.394E-01       |
| E(KD)<br>cm <sup>-1</sup> | 0.000E+00       | 7.281E+01       | 1.203E+02       | 1.483E+02       | 1.887E+02       | 2.320E+02       | 3.861E+02       | 4.185E+02       |
| <b>6-b</b>                | KD <sub>0</sub> | KD <sub>1</sub> | KD <sub>2</sub> | KD <sub>3</sub> | KD <sub>4</sub> | KD <sub>5</sub> | KD <sub>6</sub> | KD <sub>7</sub> |
| $g_x$                     | 2.880E-02       | 9.654E-01       | 9.289E-01       | 3.698E+00       | 1.236E+00       | 5.092E-01       | 7.397E-01       | 3.549E-01       |
| $g_y$                     | 5.044E-02       | 2.624E+00       | 4.400E+00       | 5.429E+00       | 2.667E+00       | 8.448E-01       | 5.763E+00       | 6.468E+00       |

|                           |               |               |               |               |               |               |               |               |
|---------------------------|---------------|---------------|---------------|---------------|---------------|---------------|---------------|---------------|
| $g_z$                     | 1.956E<br>+01 | 1.710E<br>+01 | 1.202E<br>+01 | 1.011E<br>+01 | 1.495E<br>+01 | 1.814E<br>+01 | 1.273E<br>+01 | 1.332E<br>+01 |
| $g_{xy}$                  | 5.808E-<br>02 | 2.796E<br>+00 | 4.497E<br>+00 | 6.569E<br>+00 | 2.940E<br>+00 | 9.864E-<br>01 | 5.810E<br>+00 | 6.477E<br>+00 |
| E(KD)<br>cm <sup>-1</sup> | 0.000E<br>+00 | 1.167E<br>+02 | 1.491E<br>+02 | 1.822E<br>+02 | 2.454E<br>+02 | 3.123E<br>+02 | 4.257E<br>+02 | 4.461E<br>+02 |

**Table S7** Angle  $\theta$  with Respect to the *ab initio* Magnetic Easy Axis (in  $^\circ$ ), Distance R to Central Dy<sup>3+</sup> (in Å), Atomic Charge Q (in e) of the Atoms in the First Sphere of **1**.

| <b>1-Dy<sup>III</sup>-a</b> | $\theta$ | R     | Q      | <b>1-Dy<sup>III</sup>-b</b> | $\theta$ | R     | Q      |
|-----------------------------|----------|-------|--------|-----------------------------|----------|-------|--------|
| O                           | 34.3     | 2.347 | -0.691 | O                           | 33.9     | 2.361 | -0.682 |
| O                           | 35.4     | 2.362 | -0.679 | O                           | 34.8     | 2.352 | -0.700 |
| O                           | 37.7     | 2.337 | -0.665 | O                           | 39.3     | 2.317 | -0.672 |
| O                           | 39.7     | 2.321 | -0.692 | O                           | 39.6     | 2.329 | -0.665 |
| O                           | 72.1     | 2.315 | -0.689 | O                           | 72.4     | 2.355 | -0.657 |
| O                           | 73.5     | 2.399 | -0.666 | O                           | 73.0     | 2.327 | -0.684 |
| O                           | 74.2     | 2.330 | -0.703 | O                           | 74.6     | 2.338 | -0.671 |
| O                           | 76.1     | 2.342 | -0.653 | O                           | 74.6     | 2.393 | -0.682 |

**Table S8** Angle  $\theta$  with Respect to the *ab initio* Magnetic Easy Axis (in  $^\circ$ ), Distance R to Central Dy<sup>3+</sup> (in Å), Atomic Charge Q (in e) of the Atoms in the First Sphere of **3**.

| <b>3-Dy<sup>III</sup>-a</b> | $\theta$ | R     | Q      | <b>3-Dy<sup>III</sup>-b</b> | $\theta$ | R     | Q      |
|-----------------------------|----------|-------|--------|-----------------------------|----------|-------|--------|
| O                           | 17.4     | 2.333 | -0.716 | O                           | 23.1     | 2.332 | -0.669 |
| O                           | 29.7     | 2.335 | -0.704 | O                           | 24.6     | 2.298 | -0.696 |
| O                           | 42.5     | 2.311 | -0.693 | O                           | 47.9     | 2.303 | -0.695 |
| O                           | 59.9     | 2.352 | -0.688 | O                           | 50.7     | 2.363 | -0.714 |
| O                           | 75.7     | 2.307 | -0.711 | O                           | 81.9     | 2.329 | -0.699 |
| O                           | 79.4     | 2.316 | -0.690 | O                           | 83.2     | 2.313 | -0.699 |
| N                           | 83.6     | 2.569 | -0.352 | O                           | 86.3     | 2.539 | -0.345 |
| N                           | 87.6     | 2.534 | -0.345 | O                           | 87.1     | 2.543 | -0.346 |

### References:

- (1) J. Luzon, R. Sessoli, *Dalton Trans.*, 2012, **41**, 13556–13567.
- (2) B. O. Roos, P. R. Taylor, P. E. M. Siegbahn, *Chem. Phys.*, 1980, **48**, 157–173.
- (3) P. Malmqvist, B. O. Roos, B. Schimmelpfennig, *Chem. Phys. Lett.*, 2002, **357**, 230–240.
- (4) B. A. Hess, C. M. Marian, U. Wahlgren, O. Gropen, *Chem. Phys. Lett.*, 1996, **251**, 365–371.
- (5) B. O. Roos, R. Lindh, P. Malmqvist, V. Veryazov, P. Widmark, *J. Phys. Chem. A.*, 2004, **108**, 2851–2858.
- (6) B. O. Roos, R. Lindh, P. Malmqvist, V. Veryazov, P. Widmark, *J. Phys. Chem. A.*,

2005, **109**, 6575–6579.

(7) B. O. Roos, R. Lindh, P. Malmqvist, V. Veryazov, P. Widmark, A. C. Borin, *J. Phys. Chem. A*, 2008, **112**, 11431–11435.

(8) L. F. Chibotaru, L. Ungur, *J. Chem. Phys.*, 2012, **137**, 064112.

(9) L. F. Chibotaru, *Adv. Chem. Phys.*, 2013, **153**, 397–519.

(10) F. Aquilante, L. De Vico, N. Ferre, G. Ghigo, P. A. Malmqvist, P. Neogady, T. B. Pedersen, M. Pitonak, M. Reiher, B. O. Roos, L. Serrano-Andres, M. Urban, V. Veryazov, R. Lindh, *Molcas 7: The next generation*. 2010, **31**, 224–247.

(11) F. Aquilante, J. Autschbach, R. K. Carlson, L. F. Chibotaru, M. G. Delcey, L. D. Vico, I. F. Galvan, N. Ferre, L. M. Frutos, L. Gagliardi, M. Garavelli, A. Giussani, C. E. Hoyer, G. L. Manni, H. Lischka, D. Ma, P. A. Malmqvist, T. Muller, A. Nenov, M. Olivucci, T. B. Pedersen, D. Peng, F. Plasser, B. Pritchard, M. Reiher, I. Rivalta, I. Schapiro, J. Segarra-Marti, M. Stenrup, D. G. Truhlar, L. Ungur, A. Valentini, S. Vancoillie, V. Veryazov, V. P. Vysotskiy, O. Weingart, F. Zapata, R. Lindh, *J. Comput. Chem.*, 2016, **37**, 506–541.
